# Supplementary material for: Earthworm assemblages in different intensity of agricultural uses and their relation to edaphic variables
Source: PeerJ. 2015 May 26;3:e979. doi: 10.7717/peerj.979 (PMC4451042; doi:10.7717/peerj.979)
Supplement: Supplemental Information 1 — Complete dataset of all samplings with details on agroecosystem, numbers of individuals collected from each earthworm species and genus and all physical, chemical and biological data related to all the analyses presented. [file peerj-03-979-s001.xlsx]

## Sheet: Species
		Physical parameters				Chemical parameters											Earthworms (indiv/sample)
System	date	Bulk density	Relative humidity	RM 0-5	RM 5=10	P	OM	EC	Ph	Ca	Mg	Na	K	N	Enzymatic activity	Soil Respiration	Aporrectodea caliginosa	Aporrectodea rosea	Aporrectodea trapezoides	Octolasion cyaneum	Octolasion tyrtaeum	Octolasion lacteum	Microscolex dubius	Microscolex phosphoreus	Eukerria sp
Ng	808	1.43621	0.208444	1.6	20	18.9	3.1146	2.08	8.98	5.75	2.375	1.95	1	0.3985	1.0321	0.167619							3
Ng	808	1.4514	0.256061	13.2	12.5	17.4	4.35	3.06	8.5	5.625	2.35	1.75	1.35	0.3815	1.0845	0.167619		1
Ng	808	1.28199	0.278921	13.5	17.5	16.5	3.4452	6.616	9.1	5.675	2.345	2.6	1.15	0.3815	0.9751	0.172857
Ng	808	1.47093	0.212555	23	20	18.9	4.611	4.2	9.1	5.75	2.225	1.95	1.25	0.3985	1.14	0.19	1						1
Ng	808	1.32421	0.223243	13.5	12	16.3	3.654	3.36	8.56	5.725	2.125	1.74	1.05	0.3815	1.14	0.19
Ng	808	1.06673	0.262639	3.4	8.5	31.14	6.612	1.68	7.1	5.6	1.93	0.89	1	0.3172	0.8769	0.119654		1					3
Ng	808	1.25173	0.173751	8.4	11	32.6	5.1852	1.024	7.2	5.68	1.87	0.69	1.1	0.313633	1.1189	0.222991							1
Ng	808	1.12869	0.247524	7.1	18.2	32.6	4.4544	1.4	6.8	5.675	1.975	0.87	1.24	0.269	1.3924	0.108776							5
Ng	808	1.44693	0.203582	11	20.5	38.5	5.568	1.72	6.7	5.99	1.98	0.74	1.2	0.4313	1.14	0.19							2
Ng	808	1.30902	0.223372	9.5	11	33.9	6.09	1.404	6.8	5.51	1.55	0.9	1.13	0.2406	1.14	0.19							4
Ng	808	1.11948	0.183175	5.7	9.6	11.57	2.2272	1.8	6.87	6.5	1.55	1	0.97	0.35	1.2871	0.177723
Ng	808	1.13625	0.158187	14.2	17.5	14.3	2.7492	2.252	7.3	5.89	1.625	0.99	1.21	0.35	1.1428	0.177723							2
Ng	808	1.20951	0.251699	8.2	13.8	12.5	2.5404	2	7.5	6.6	1.815	1.02	1.25	0.3018	1.3371	0.382375	3
Ng	808	1.33217	0.219392	12.5	9.5	11.69	2.9406	3.24	7.54	5.845	1.56	0.98	1.12	0.35	1.14	0.19							1
Ng	808	1.34512	0.199824	7.2	6.5	16.5	3.0972	2.12	7.5	5.725	1.55	1.4	1.05	0.4206	1.14	0.19
Ng	811	1.656	0.121003	15	21	17.4	3.4452	2.28	9.1	5.125	2	1.75	1.72	0.2502	0.416	0.138
Ng	811	1.53302	0.171941	17	17	15.4	4.4544	3.14	8.6	5.625	2.025	2	1.06	0.2516	0.365	0.1626
Ng	811	1.5098	0.14528	15	17	18.6	2.871	6.8	9.2	5.5	2.075	2.05	1.35	0.3765	0.554	0.138	1
Ng	811	1.54091	0.144094	18	19	17.8	3.654	4.4	8.95	5.525	1.875	1.85	1.65	0.2775	0.32	0.1		1
Ng	811	1.46146	0.139069	14	14	15.96	3.5322	4.128	9.1	5.825	2.05	2	1.1	0.2074	0.32	0.1
Ng	811	1.11152	0.13017	16.5	16	32.1	5.568	0.7606	6.63	5.875	1.925	0.87	1.2	0.304	0.228	0.0432							2
Ng	811	1.09067	0.0669923	18.9	26	33.2	4.5762	1.388	6.27	5.67	1.8	0.69	1	0.3496	0.369	0.0384		1					2
Ng	811	1.1884	0.139236	13.5	26	34.5	4.785	1.108	6.4	5.8	1.845	0.54	1	0.3418	0.203	0.0817							4
Ng	811	1.27081	0.0677431	30	30	35.89	4.698	1.8	6.8	5.625	1.675	0.9	1.45	0.2837	0.32	0.1							2
Ng	811	1.03918	0.0949307	17	20.75	33.9	4.6806	1.25	7.1	5.78	1.56	0.68	1.62	0.2115	0.32	0.1							2
Ng	811	1.15907	0.23502	10	20	11.78	2.8536	1.1	6.9	6.05	1.5	1	1.12	0.3034	0.388	0.1049							1
Ng	811	1.32506	0.0182648	13	16	12.1	2.1054	0.924	7.71	6.77	1.55	1.36	1.36	0.2711	0	0.0799
Ng	811	1.29034	0.138736	7.5	11.5	12.9	1.74	0.98	7.25	6.6	1.6	1.23	1.25	0.244	0.361	0.0899	2
Ng	811	1.03313	0.239417	10	26.5	12.3	5.3418	0.848	7.83	6.315	1.6	0.99	1.14	0.2475	0.32	0.1
Ng	811	1.18788	0.0437446	17	23	11.74	2.958	1.156	7.34	6.325	1.57	1.32	1.2	0.244	0.32	0.1
Ng	902	1.48567	0.232404	5	5	14.95	3.4104	2.202	9.01667	6.15	1.9	1.32	1.32	0.4385	0.309	0.1779
Ng	902	1.58497	0.121162	10	7	16.1	3.3756	2.7368	8.51333	5.65	2.05	1.63	1.47	0.18	0.048	0.1937		1
Ng	902	1.4712	0.160483	5	7	15.06	3.219	5.1092	9.08333	5.9	1.8	1.35	1.5	0.2728	0.212	0.1779
Ng	902	1.58366	0.131645	13	10	18.9	3.2364	3.9016	9.00333	6.05	1.9	1.43	1.69	0.2232	0.16	0.09
Ng	902	1.6856	0.127195	7.5	9	14.7	3.0972	2.9784	8.67	5.45	1.57	1.41	1.7	0.3514	0.16	0.09
Ng	902	1.21195	0.116453	10	9	13	2.09301	1.24788	6.81	6.05	1.48	0.95	1.23	0.4657	0.176	0.0179							4
Ng	902	0.803273	0.0798264	16	25	17.14	1.88766	2.72	5.98	6.55	1.32	0.93	1.6	0.2242	0.142	0.0465
Ng	902	1.24818	0.124875	20	23	13.75	5.1504	1.48	6.5	6.15	1.29	0.96	1.52	0.3431	0.199	0.0036
Ng	902	0.959271	0.124366	11	15	10.74	1.96631	1.88	5.83	5.7	1.37	0.82	1.4	0.3112	0.16	0.09
Ng	902	1.10994	0.114298	18	30	14.5	2.44842	2.88	5.63	5.65	1.5	0.95	1.1	0.305	0.16	0.09
Ng	902	1.1373	0.131903	17	25	14.7	2.54318	1.58	6.23667	5.95	2	1.1	1.13	0.3823	0.145	0.1395		1					1
Ng	902	1.23154	0.107284	19	22	16.2	2.54318	1.88	7.2	6.6	2.05	1.44	1	0.2145	0.121	0.0578
Ng	902	1.31283	0.112013	22	25	8.3	2.54318	1.92	6.08	6.75	1.79	1.25	1.1	0.2817	0.118	0.0238							1
Ng	902	1.19327	0.130346	16	21	14.3	2.29227	1.64	7.28	6.55	1.9	1	1.25	0.328	0.16	0.09		1
Ng	902	0.894425	0.0951471	10	12	13.56	2.62741	0.88	5.43	6.35	1.895	1.36	1.23	0.2667	0.16	0.09							3
Ng	905	1.53585	0.162549	11.5	19	12.1	2.39007	3.188	8.68	5.9	2	1.73	1.23	0.217	0.0201	0.0599
Ng	905	1.30882	0.200744	20	20	14.3	2.2875	2.82	8.1	5.5	2.25	1.74	1.56	0.171	0.1407	0.0498
Ng	905	1.49987	0.153293	16	19.5	13.6	2.22748	2.788	8.44	5.6	1.9	1.48	1	0.206	0.0185	0.2428
Ng	905	1.45574	0.185227	14.75	14	12.6	2.41164	3.748	8.53	5.65	2.05	2	1.21	0.1431	0.03	0.0345							1
Ng	905	1.35492	0.203136	10.5	14	11.8	2.53351	3.172	9.18	6.45	1.9	2.1	1.1	0.3042	0.0455	0.0498	2
Ng	905	1.03254	0.251529	16.5	13	13.9	2.54203	1.164	6.82	6.55	1.8	0.91	1.3	0.3308	0.0048	0.0668							1
Ng	905	1.2397	0.171936	6	9	12.36	2.31159	1.88	6.7	6.05	1.605	0.7	1.1	0.2647	0.0414	0.07
Ng	905	1.10139	0.148803	13.5	25	14.5	2.62035	1.24	6.72	6	1.6	0.65	1	0.361	0.0001	0.0303
Ng	905	1.4587	0.166727	8	16.5	13.7	2.62035	1.7	6.9	6.5	1.9	0.8	1.41	0.191	0.03	0.0495							1
Ng	905	1.4587	0.166727	7.5	17.5	14.1	2.26036	3.196	6.7	5.95	1.85	0.87	1.63	0.2268	0.0263	0.0251
Ng	905	1.17064	0.228933	8.25	12.75	12.1	2.5242	0.94	7.3	6.15	1.6	1.3	1.24	0.2606	0.0001	0.0347		1
Ng	905	1.26285	0.209978	5.5	10	12.5	3.8	1.916	6.9	6.45	1.95	0.98	1.2	0.4342	0.0067	0.1672
Ng	905	1.32829	0.205278	10.5	17	13.9	2.39819	1.188	7.2	6.27	1.58	1.1	1.2	0.3	0.0802	0.1264							1
Ng	905	1.34032	0.192983	10.5	20	14.7	2.33913	0.904	7.3	6.48	1.9	0.88	1.25	0.2423	0.03	0.0194	1	1	1
Ng	905	1.41516	0.185798	18	24.5	13.1	2.32467	0.936	7.15	6.425	1.825	0.94	1.1	0.287	0.011	0.0653
Ng	908	1.46395	0.195129	14.5	13	2.48318	2.9	1.48	9.35	5.71	2.08	1.75	1.304	0.22643	0.167619	0.09
Ng	908	1.33329	0.21504	12	12	3.361	3.84	1.768	9.15	5.615	2.17	1.814	1.398	0.24532	0.167619	0.07216
Ng	908	1.35474	0.224456	14	15	2.68575	2.85	1.64	9.25	5.665	2.074	1.966	1.25	0.19224	0.172857	0.11176
Ng	908	1.41125	0.199198	11	9	4.1713	4.91	2.76	9.61	5.74	2.055	1.856	1.41	0.30852	0.19	0.07216
Ng	908	1.4627	0.188504	11.75	9	4.57645	3.14	1.392	9.22	5.82	1.964	1.76	1.22	0.20682	0.19	0.11176
Ng	908	1.19533	0.230337	6	8.5	3.49605	4.88	0.708	6.94	6.06	1.777	0.88	1.196	0.28326	0.119654	0.09							1
Ng	908	1.1448	0.253031	4.5	5.75	6.46715	5.41	0.824	6.98	5.925	1.804	0.742	1.16	0.40152	0.222991	0.08536							1
Ng	908	1.34138	0.187601	13.5	18.25	8.15527	3.67	0.804	8.32	5.925	1.717	0.726	1.222	0.17937	0.108776	0.10736
Ng	908	1.2677	0.224454	7.75	10	5.38675	3.94	0.668	7.09	5.963	1.835	0.74	1.304	0.27032	0.19	0.04236							1
Ng	908	1.34941	0.217591	5	6.5	5.18418	4.16	0.836	6.78	5.723	1.767	0.786	1.366	0.34092	0.19	0.10296
Ng	908	1.28599	0.275592	3	4	4.91408	3.99	0.72	7.77	6.186	1.615	1.036	1.084	0.27	0.177723	0.09
Ng	908	1.1923	0.234564	4.25	6	7.07488	5.91	0.74	8.88	6.267	1.68	1.128	1.124	0.31558	0.177723	0.13816			11
Ng	908	1.27855	0.221262	6.75	8	9.50577	5.12	0.74	7.81	6.594	1.62	1.166	1.16	0.20682	0.382375	0.09416							1
Ng	908	1.25454	0.172794	7	12	8.83053	5.93	1.304	7.56	6.388	1.677	0.94	1.148	0.38562	0.19	0.08976
Ng	908	1.38191	0.191335	7	12.25	9.16815	5.33	0.82	7.86	6.165	1.643	1.17	1.128	0.26479	0.19	0.10736
Ng	912	0.743893	0.200734	6.5	6.5	17.2045	4.96643	3.844	8.94	8.5	2.3	2.17	2.96	0.167565	0.0185299	0.09
Ng	912	0.824618	0.204191	11	8.5	3.592	5.34126	4.452	9.05	7.8	2.325	2.26	1.52	0.183312	0.0570183	0.07216
Ng	912	0.905386	0.175691	18	18	7.51075	3.27972	4.36	9.22	9.25	2.015	3.91	2.4	0.173044	0.0564797	0.11176
Ng	912	0.773038	0.281008	4	7	9.26388	4.77902	3.768	8.59	9.9	1.955	1.56	2.48	0.206246	0.0743986	0.07216
Ng	912	0.811496	0.172697	21	21	11.3264	4.02937	4.712	9.07	7	2.385	2.73	2.34	0.19843	0.105172	0.11176
Ng	912	1.07619	0.261006	8.5	10.25	10.9139	4.4979	0.724	6.58	7.715	1.1	1	2.16	0.306924	0.26	0.09
Ng	912	0.887067	0.198262	3.25	6.5	1.22013	5.62238	1.024	6.49	7.715	0.78	1.04	3.3	0.304757	0.26	0.08536
Ng	912	1.12608	0.267441	2.5	7.5	9.7795	4.68531	0.792	6.98	7.715	1.115	0.92	3.7	0.18234	0.26	0.10736
Ng	912	1.26129	0.140194	6.5	9.5	1.63262	5.43497	0.732	7.15	7.715	0.61	1	1.75	0.189458	0.26	0.04236
Ng	912	1.0936	0.26984	3.25	3.25	1	3.09231	0.672	6.67	7.715	0.85	1.09	2.19	0.266328	0.26	0.10296
Ng	912	1.02444	0.256309	8	8.75	2.04513	5.80979	1.752	8.16	9.9	1.715	0.08	1.7	0.177121	0.26	0.09		3		3		3
Ng	912	0.58058	0.469417	3	4.75	29.3733	6.09091	1.324	6.45	11.7	1.5	0.21	2.24	0.309613	0.26	0.13816				1		3
Ng	912	1.03158	0.236944	4.25	6.5	8.9545	6.37203	0.996	7.02	9.505	1.56	0.05	1.56	0.294369	0.26	0.09416		1					1
Ng	912	1.07446	0.139702	4.75	11.5	8.542	6.74685	0.94	6.97	10.2	1.7	0.08	1.74	0.267977	0.26	0.08976		3		2
Ng	912	0.879575	0.211669	6	7.75	11.2233	5.9972	0.672	6.54	11.05	1.89	0.04	2.26	0.230571	0.26	0.10736				5		3	4
Ng	1003	1.30336	0.149056	20	20	5.55138	1.94909	4.12	8.91	6.5	2.5	2.1	1.9	0.2404	0.348594	0.08
Ng	1003	1.33769	0.144149	28	30	7.717	3.65455	3.916	9.18	6.15	1.85	2.15	1.6	0.2975	0.209042	0.0384573
Ng	1003	1.44134	0.14008	16	7	0.7045	1.94909	5.264	9.53	7.1	2.6	2.03	2.5	0.1814	0.214714	0.0665813
Ng	1003	1.35157	0.1325	30	30	0.1	2.43636	2.724	8.96	6.675	1.115	2.02	2	0.199	0.35	0.0632653	6
Ng	1003	1.27607	0.150801	18	16	1.32325	1.70545	4.692	9.56	5.725	2.15	1.9	2.1	0.2099	0.35	0.029623
Ng	1003	1.22148	0.226835	1	3	5.44825	3.41091	0.816	6.65	7.125	1.225	0.96	1.66	0.3189	0.35	0.08
Ng	1003	1.09699	0.239388	5.5	10	1.73575	6.82182	1.044	6.4	6.25	1	1.02	2.6	0.4119	0.466	0.08	1
Ng	1003	0.998336	0.217128	10.5	11.5	1.32325	5.11636	1.004	7.12	6.725	3.2	1.15	1.7	0.3435	0.327	0.0414459
Ng	1003	1.20866	0.220263	0	4	2.87012	3.16727	0.652	6.45	7	2	0.76	1.89	0.3533	0.35	0.072445							1
Ng	1003	1.16025	0.200714	8	9	1.32325	1.70545	0.676	6.51	7.05	0.95	0.89	2.1	0.2664	0.385	0.0251228
Ng	1003	0.912774	0.217019	6.5	8	1.117	5.36	1.06	6.64	10	2.1	1	1.6	0.396	0.478022	0.08
Ng	1003	0.9669	0.30472	8	10.5	9.88263	4.87273	1.224	6.94	9	1.625	0.84	1	0.2743	0.355252	0.198151		1		1			2	1
Ng	1003	1.20155	0.204598	9.5	12.5	0.91075	5.84727	1.04	6.19	10.6	1.85	0.98	1.3	0.3313	0.395803	0.0422113								1
Ng	1003	1.12178	0.254148	6	13	0.49825	3.16727	1.572	8.29	10.1	2.3	0.89	1.35	0.3263	0.35	0.121157		3		2		1
Ng	1003	1.19452	0.174365	8.5	7.5	1.5295	4.38545	0.944	7.38	9.55	2.55	1.57	1.2	0.241	0.35	0.126881				1		1
Ng	1006	1.21754	0.411711	0.5	4	6.22938	7.14667	0.572	7.02	5.5	2	2	1.5	0.34396	0.15	0.133222		3
Ng	1006	1.22031	0.46	0	2.5	5.20893	5.98	0.46	7.41	6.15	2.1	2.15	1.95	0.33508	0.09	0.196778	1
Ng	1006	1.15507	0.489324	4	8.5	3.37212	8.93333	0.552	7.45	5.45	1.9	1.74	2.6	0.34945	0.15	0.0354444								2
Ng	1006	1.4278	0.328328	1	3	14.1889	4.35	0.528	6.89	6.35	1.9	2.01	2.1	0.51163	0.178942	0.1		1
Ng	1006	0.900481	0.46	0.5	3.5	12.7603	3.27556	0.432	7.9	5.55	2.05	1.89	2	0.27089	0.16	0.108778
Ng	1006	1.23662	0.342552	16.25	26.75	14.9644	3.07541	0.512	8.1	7.175	1.5	1	1.78	0.28718	0.15	0.0892222							6
Ng	1006	1.15553	0.372339	9.25	16.75	17.1686	5.27213	0.3636	7.45	6.325	1.35	1.15	2.03	0.16865	0.07	0.0892222
Ng	1006	1.44102	0.301538	5.5	10.5	19.3728	4.17377	0.354	7.21	6	2.65	1.22	1.55	0.21308	0.113624	0.099
Ng	1006	1.22228	0.371213	8	11.75	21.5769	4.93	0.436	7.46	8	1.5	0.93	1.9	0.26706	0.166247	0.1
Ng	1006	1.23773	0.370298	9.5	9.5	23.7811	4.93	0.404	7.52	6.5	1.5	0.98	2	0.2888	0.15	0.0598889
Ng	1006	1.24267	0.343001	0	3.5	2.14758	6.25333	0.3956	7.69	8.8	1.545	1.23	1.7	0.3831	0.15	0.103889							4
Ng	1006	1.21248	0.383869	4.5	8.5	0.1	5.65778	0.404	8.07	8.05	1.28	0.96	1.95	0.26545	0.23	0.133222							4
Ng	1006	1.32928	0.305957	9.5	15.5	2.14758	4.76444	0.576	8.73	6.95	1.325	2.02	1.45	0.26387	0.157353	0.0207778
Ng	1006	1.25372	0.326759	4.5	8	0.1	5.65778	0.552	8.46	9.35	1.3	1.35	1.4	0.27872	0.254851	0.1							7
Ng	1006	1.22912	0.348815	2.5	8	0.1	6.84889	0.404	7.29	8.545	1.4	1.4	1.66	0.37243	0.13	0.145444							3
Ng	1009	1.33158	0.293377	1.5	6	8.6521	2.14906	0.2832	7.85	6	1.9	2	1.4	0.1661	0.176	0.0308
Ng	1009	1.13585	0.419953	3.5	13	6.28553	8.59623	0.1896	6.69	5.225	1.445	2.03	2.03	0.4897	0.311	0.1342
Ng	1009	1.33033	0.281886	1	1	5.72869	7.33208	0.234	6.67	5.15	2.05	1.9	1.93	0.4183	0.234	0.0506								4
Ng	1009	1.22089	0.344484	1	3	4.96304	6.95283	0.1604	6.81	6.05	1.575	1.75	2.98	0.3535	0.184	0.044
Ng	1009	1.11507	0.466352	1	1	16.8655	4.80377	0.2148	7.17	5.65	1.6	1.9	3.1	0.1852	0.221	0.077
Ng	1009	1.25226	0.292894	3.5	7.5	3.98857	3.91887	0.1076	7.47	6.5	1.48	1.03	1.4	0.2499	0.181	0.0748
Ng	1009	1.19182	0.289538	2.5	5	3.22291	2.78113	0.1068	7.24	6.5	1.445	1	1.78	0.1787	0.15	0.0154							3
Ng	1009	1.1273	0.377049	13	11	7.74724	5.0566	0.2712	6.93	5.95	2.5	0.96	1.66	0.2694	0.148	0.0044
Ng	1009	1.16295	0.345134	7.5	14	2.17883	4.29811	0.2352	7.09	7.7	1.175	0.95	1.9	0.1817	0.19	0.055
Ng	1009	1.30001	0.305661	4	6.5	1.55239	3.53962	0.1456	7.03	6.1	1.6	1.1	2	0.3013	0.154	0.0176							4
Ng	1009	1.14144	0.331989	5.5	9.5	3.50133	5.56226	0.2648	7.68	8	1.55	1.44	1.1	0.2662	0.194	0.033		1
Ng	1009	1.24424	0.297637	5.5	9.5	4.54541	5.68868	0.3152	8.29	8.5	1.33	0.98	2.03	0.1443	0.17	0.099							2
Ng	1009	1.32572	0.263419	1.5	6	4.4062	4.04528	0.2384	7.56	8.175	1.39	2.1	1.15	0.1733	0.164	0.022	3
Ng	1009	1.31954	0.216358	6.5	11	5.58948	5.94151	0.2688	6.7	9	1.45	1.75	2	0.2594	0.154	0.0132							3
Ng	1009	1.15111	0.308861	3.5	8.5	4.75422	4.1717	0.2328	8.14	7.8	1.39	1.9	1.7	0.1712	0.187	0.044		11
Ng	1012	1.00794	0.205758	8	7.5	6.61035	2.72187	0.6756	8.16	5.8	2	1.9	1.1	0.2658	0.114	0.0322286
Ng	1012	1.13399	0.152508	17.5	30	4.80062	1.675	0.4488	9.14	5	1.95	2.1	1.98	0.1075	0.146	0.0168
Ng	1012	0.959313	0.46	23	30	4.4758	2.72187	0.4948	6.59	5	2.15	1.65	1.6	0.2125	0.154	0.0288
Ng	1012	1.2883	0.11855	16	15.5	0.2995	2.5125	0.3448	7.03	5.65	2.025	1.66	2.45	0.2321	0.171	0.0202286
Ng	1012	1.06379	0.230272	15.5	12.5	4.75422	2.30313	0.362	7.15	5.1	2.05	1.8	2.9	0.1736	0.127	0.0339429
Ng	1012	1.07537	0.168958	7.5	16	7.53842	4.60625	0.4396	6.51	6.35	1.475	1.45	1.7	0.3218	0.156	0.0296571
Ng	1012	0.806555	0.103612	10.5	13.5	2.43405	4.60625	0.5068	6.57	6.725	1.6	1.15	1.7	0.2647	0.154	0.0296571
Ng	1012	1.10159	0.16976	12	22	3.64054	3.76875	0.4176	6.34	6.55	2.15	0.89	1.89	0.2401	0.156	0.0219429
Ng	1012	0.808519	0.10879	23	0	3.91896	2.72187	0.4232	6.67	5.475	1.33	0.98	2.3	0.2006	0.15	0.0236571
Ng	1012	1.40026	0.260873	8	10	4.93983	2.93125	0.5424	6.57	6.775	1.7	1.6	2.1	0.215	0.172	0.0253714
Ng	1012	1.22631	0.137471	24	0	7.81684	4.60625	0.3884	7.1	7.5	1.525	0.9	1.6	0.3476	0.08	0.0399429		4		3		3
Ng	1012	1.20491	0.119566	7.5	17	5.31106	6.49062	0.3164	6.6	7.8	0.9	0.77	2	0.217	0.14	0.0288				1		3	2	1
Ng	1012	1.11848	0.117393	23	0	9.34815	6.28125	0.3112	6.07	7.1	1.45	1.8	1.23	0.2693	0.138	0.0193714		2					1
Ng	1012	1.21787	0.124292	17	23.5	7.63123	4.60625	0.2928	6.55	8.45	1.025	1.43	1.98	0.2585	0.15	0.0330857		3		2
Ng	1012	1.34155	0.1389	15	20.5	9.30175	6.07188	0.288	6.38	8.65	1	1.65	1.98	0.424	0.114	0.0348				5		3	4
Cg	808	0.976633	0.150236	6	4.5	13.54	2.958	2.408	5.8	5.15	2	0.37	1.81	0.3463	0.8224	0.0830189
Cg	808	0.95743	0.102693	3.5	4.3	12.36	3.4104	1.956	5.64	4.8	1.825	0.61	1.84	0.3463	0.7431	0.102553
Cg	808	1.08068	0.145996	7	7.5	16.1	2.6796	1.84	5.9	4.84	2.05	0.96	1.69	0.3423	0.9464	0.0927858
Cg	808	1.03457	0.116522	7.3	13	13	3.036	2.416	5.62	5.115	2.05	0.61	1.76	0.3423	0.75	0.12
Cg	808	1.047	0.158291	5	6	15.24	3.0972	2.28	5.69	4.825	2	0.52	1.78	0.3423	0.75	0.12
Cg	808	0.936845	0.147771	5	21	28.3	3.9672	0.84	6.2	5.215	1.845	0.85	1.23	0.3518	0.4603	0.073009
Cg	808	0.908828	0.117881	9	29	26.8	4.698	1.98	5.7	5.05	1.5	0.7	1.35	0.3913	0.6631	0.082835
Cg	808	1.20077	0.124986	11	15	22.65	4.4544	1.24	6.23	5.345	1.625	0.78	1.05	0.3913	0.8403	0.0779623
Cg	808	1.06081	0.120397	3.9	5.5	23.6	3.915	1.24	6.2	5.35	1.615	0.69	1.44	0.3518	0.75	0.12
Cg	808	1.03424	0.133982	5	20	27.2	4.002	0.74	6.4	5	1.825	0.74	1.45	0.3913	0.75	0.12
Cg	808	0.936121	0.176128	16	26	33.77	5.568	1.8	5.64	5.625	2.06	0.85	1.37	0.433167	0.9533	0.207595
Cg	808	1.07259	0.142069	1	9	33.6	5.916	1.28	6.1	5.445	2	0.96	1.56	0.355	0.4224	0.146835
Cg	808	1.05654	0.240959	6	13.5	38.6	4.6806	1.16	5.7	5.315	2.39	0.98	1.8	0.3898	0.9076	0.253165
Cg	808	1.13408	0.0946416	4	13	34.79	4.4892	1.68	5.6	5.05	2	0.75	1.98	0.330633	0.75	0.12
Cg	808	1.00524	0.15211	1	2.5	33.2	5.0286	1.92	5.65	5.05	2.05	0.89	1.39	0.387267	0.75	0.12
Cg	811	1.20846	0.140789	0.0001	1	16.64	4.2108	1.128	5.15	5.45	2.05	0.366	1.08	0.3547	0.047	0.0599
Cg	811	1.13382	0.0983759	0.0001	0.0001	19.3	3.8802	1.94	5.2	5.625	1.875	0.26	1.78	0.3351	0.442	0.0699
Cg	811	1.16473	0.17843	0.0001	0.25	17.58	3.915	1.988	5.3	5.5	1.845	0.35	1.77	0.4035	0.0001	0.0749
Cg	811	1.17722	0.140279	1.5	2.25	16.1	3.654	0.988	5.05	5.39	2.05	0.62	1.17	0.3369	0.31	0.09
Cg	811	1.16696	0.122633	1	9	15.4	4.0716	1.904	5.14	5.315	2	0.65	1.44	0.3484	0.31	0.09
Cg	811	1.15019	0.0925725	2	4.5	21.4	3.8802	1.2	7.1	5	1.98	0.98	1.25	0.3985	0.358	0.0967
Cg	811	1.14269	0.126043	2	5.5	28.7	4.5936	2.04	6.7	5.05	1.77	0.85	1.36	0.3285	0.642	0.0967
Cg	811	1.06239	0.160084	5	7.5	20.2	4.3848	0.736	7.4	5.115	1.895	0.74	1.35	0.361	0.464	0.0967
Cg	811	1.2297	0.101615	4.5	7.5	23.21	4.1064	1.54	6.3	5.315	1.66	0.85	1.35	0.3164	0.31	0.09
Cg	811	1.27857	0.114089	4	10.5	20.6	4.698	0.84	6.5	5.225	1.98	0.83	1.48	0.2808	0.31	0.09
Cg	811	1.09238	0.142625	0.75	3.5	31.24	4.6806	1.076	5.52	5.5	2	0.96	1.25	0.4112	0.31	0.0978
Cg	811	1.0303	0.196987	1.5	1	32.1	4.263	1.112	5.35	5.815	2.07	0.86	1.96	0.4133	0.127	0.1184
Cg	811	1.161	0.156	2.5	2	36.8	4.872	1.18	5.47	5.51	2.06	0.88	1.9	0.4397	0.414	0.0926
Cg	811	1.12855	0.154487	0.5	0.0001	31.4	4.6806	1.84	6.3	5.39	2.165	0.71	1.67	0.3133	0.31	0.09
Cg	811	1.28363	0.145558	3	3.5	33.6	4.7502	1.812	5.9	5.625	2.225	0.74	1.89	0.3879	0.31	0.09
Cg	902	0.998271	0.251861	0.0001	1	16.6317	2.78885	1.13333	5.57	5.25	1.75	0.52	1	0.3536	0.235	0.0039
Cg	902	1.05509	0.245216	0.0001	0.5	8.40754	2.6321	1.08	4.97	4.8	1.815	0.49	1.1	0.4284	0.625	0.1619
Cg	902	0.985052	0.259714	0.0001	1.5	9.77824	2.73	1.13	5.56667	5.1	1.6	0.48	1.02	0.3657	0.286	0.0671
Cg	902	1.08561	0.285939	0.0001	0.0001	26.7749	2.3394	1.28	6.34	4.65	2.05	0.43	1.5	0.2822	0.34	0.11
Cg	902	1.16571	0.257602	0.0001	0.0001	6.48856	2.61165	1.04	5.39	2.8	2.1	0.5	1	0.2859	0.34	0.11
Cg	902	0.966637	0.248469	1.5	4	21.47	3.11	1.17	5.0475	5.5	1.825	0.78	1.3	0.3126	0.445	0.0805
Cg	902	1.07226	0.244235	0.0001	3	21.47	2.21392	1.28	4.83	6	1.825	0.9	1.2	0.3214	0.34	0.351
Cg	902	0.924875	0.245396	0.75	4.25	26.3637	2.16294	1.12	4.85	5.15	1.945	0.84	1.14	0.3059	0.34	0.0998
Cg	902	1.10738	0.279427	1.25	3	17.18	2.20484	1.2	5.8	5.05	1.66	0.76	1	0.3993	0.34	0.11
Cg	902	0.970517	0.281697	0.0001	1.25	20.8809	2.23959	1.08	4.71	5.3	1.55	0.85	1.6	0.2271	0.34	0.11
Cg	902	1.04746	0.235	0.5	2.5	17.18	2.56	1.12	5.1775	6	2	0.74	1.62	0.431	0.381	0.0526
Cg	902	1.03891	0.294613	0.5	1	8.68168	2.14691	1.08	5.07	5.15	1.85	0.74	1.8	0.3342	0.104	0.0607
Cg	902	1.01379	0.28881	3	4.25	7.03684	2.11067	1.12	5.2	5.7	2.1	0.69	1.64	0.3558	0.305	0.0769
Cg	902	1.05562	0.258489	0.5	3	18.5507	2.20484	1	5.1	5.2	2.05	0.92	1.7	0.3993	0.34	0.11
Cg	902	1.0013	0.270542	0.0001	0.5	12.1084	2.25097	1.28	5.34	5.3	1.78	0.87	1.89	0.3324	0.34	0.11
Cg	905	1.11941	0.210563	0.0001	4.5	12.53	2.60749	0.764	6.445	5.35	1.55	0.49	1.2	0.3554	0.0575	0.0309
Cg	905	1.00807	0.144898	5.5	12.5	13.65	2.30747	0.608	6.37	5.28	1.605	0.52	1.24	0.3194	0.0208	0.0415
Cg	905	0.974003	0.178731	0.5	1	14.04	2.18245	0.78	6.62	5.15	1.625	0.45	1.74	0.3389	0.0256	0.0735
Cg	905	1.0011	0.188412	1	14.5	11.4	2.43016	0.744	6.29	5.5	1.5	0.62	1.65	0.3247	0.05	0.0362
Cg	905	1.05062	0.19036	4.5	9	12.91	2.40266	0.944	6.47	5.5	1.815	0.47	1.32	0.36	0.0453	0.1001
Cg	905	1.16229	0.231144	7	17.5	9.23	2.51172	1.059	6.65	5.45	1.63	0.62	1.1	0.4108	0.0672	0.06
Cg	905	1.03661	0.230745	2	12	11.11	2.62158	1.004	6.52	4.825	1.6	0.92	1.12	0.3152	0.0327	0.0489
Cg	905	1.05825	0.134796	3	20	10.93	2.4583	1.076	6.41	5.29	1.99	0.78	1.3	0.3448	0.0703	0.0989
Cg	905	1.09232	0.232284	3	7.5	11.1	2.42235	0.952	6.83	4.8	1.65	0.93	1.41	0.3666	0.05	0.0433
Cg	905	1.11685	0.26746	3	11.5	12.1	2.91475	1.204	6.52	4.65	1.57	0.9	1.45	0.3547	0.0632	0.11
Cg	905	1.14118	0.242681	1	4	9.7	2.37436	1.044	5.81	5.5	2	0.95	1	0.36	0.0695	0.0387
Cg	905	0.934017	0.178144	1.5	4.5	4.9	2.2123	0.736	5.79	5.8	1.925	0.88	1.1	0.3175	0.0393	0.0489
Cg	905	0.938949	0.250613	1	1.5	8.29	2.39007	0.82	6.065	5.1	1.85	0.93	1.23	0.4573	0.0404	0.2244
Cg	905	1.08153	0.2481	0.0001	0.0001	10.95	2.37469	0.9	5.85	4.85	1.65	0.81	1.48	0.4415	0.05	0.0419
Cg	905	1.04569	0.25761	2	3.5	7.91	2.41144	1.492	6.55	6.3	1.8	0.84	1.74	0.2793	0.0306	0.0526
Cg	908	1.06796	0.261689	0.0001	0.0001	3.67948	7.06	0.548	5.55	5.26	1.895	0.4392	1.268	0.18945	0.0830189	0.0540098
Cg	908	1.04961	0.22521	0.0001	0.0001	12.8247	6.08	0.68	6.1	5.09	1.859	0.48	1.502	0.34229	0.102553	0.0913964									1
Cg	908	1.08908	0.275825	0.0001	0.5	7.17563	3.36	0.564	6.15	5.118	1.874	0.52	1.494	0.28195	0.0927858	0.11303
Cg	908	1.03908	0.24503	0.0001	0.0001	5.43009	5.51	0.524	6.76	5.146	1.975	0.564	1.466	0.30413	0.12	0.0635183
Cg	908	1.30303	0.23811	0.5	0.5	5.70918	5.23	0.916	7.08	4.698	2.018	0.528	1.338	0.26956	0.12	0.058022		4							1
Cg	908	1.42539	0.319118	0.0001	0.0001	10.17	4.52	0.284	5.41	5.268	1.856	0.802	1.196	0.19279	0.073009	0.0810942
Cg	908	1.02401	0.318278	0.5	0.0001	8.25618	5.63	0.444	5.19	5.22	1.737	0.86	1.206	0.33668	0.082835	0.0749361
Cg	908	1.19289	0.240845	0.5	0.5	6.15685	3.86	0.368	5.44	5.249	1.901	0.778	1.188	0.25254	0.0779623	0.00610391
Cg	908	1.06743	0.292265	0.0001	0.5	8.14522	4.38	0.544	5.67	5.143	1.727	0.78	1.29	0.28278	0.12	0.100352
Cg	908	1.1648	0.252528	0.0001	1	6.49447	4.14	0.748	6.5	5.06	1.753	0.824	1.486	0.15593	0.12	0.0631234
Cg	908	1.06395	0.301385	0.0001	0.0001	4.36888	6.22	0.492	6.09	5.625	2.035	0.842	1.338	0.34139	0.207595	0.07		1							3
Cg	908	1.0852	0.270021	0.5	0.5	2.51136	6.43	0.548	5.75	5.516	2.039	0.816	1.556	0.3395	0.146835	0.0332121
Cg	908	1.0852	0.298575	0.5	0.5	5.36559	7.05	0.516	5.5	5.385	2.09	0.826	1.534	0.20682	0.253165	0.0423834		2							1
Cg	908	1.08717	0.210772	0.5	0.5	3.5303	5.97	0.532	6.34	5.108	1.969	0.786	1.616	0.25	0.12	0.0522049
Cg	908	1.25349	0.355954	0.0001	0.0001	16.487	3.99	0.568	8.96	5.511	1.971	0.806	1.632	0.2196	0.12	0.0880227		1							3
Cg	912	1.12	0.37	0.25	1.75	7.2	2.09028	1.024	6.83	7.05	1.06	0.57	0.66	0.238899	0.0598356	0.04
Cg	912	0.99	0.35	3	6	13.08	4.1375	0.864	6.17	6.445	1.015	0.69	0.73	0.300199	0.0698416	0.08096									2
Cg	912	0.95	0.3	3.5	6	15.24	3.48611	0.816	6.1	7.8	1.275	0.68	0.98	0.351906	0.032093	0.02826
Cg	912	1.08	0.35	6.5	7	14.49	2.83472	0.544	6.5	6.725	0.995	0.48	0.88	0.260669	0.0670429	0.02816
Cg	912	1.1	0.41	1.5	3	10.85	3.11389	0.944	6.29	6.605	0.89	0.52	0.76	0.236272	0.0508179	0.17776
Cg	912	1.13	0.42	2	4.5	13.35	2.83472	0.764	6.06	4.55	0.89	0.05	0.44	0.270238	0.0813177	0.04
Cg	912	1	0.43	2	6.5	51.22	3.85833	0.972	6.3	4.27	1.055	0.03	1.44	0.39237	0.0683252	0.00616									2
Cg	912	1.25	0.32	0.5	0.75	14.83	1.625	1.664	7.32	4.335	0.955	1.21	1.1	0.194635	0.0670003	0.01496		1							1
Cg	912	0.9	0.45	2	4	40.01	3.3	0.788	6.28	2.825	1.015	0.03	1.8	0.327559	0.0463447	0.03256									3
Cg	912	0.95	0.46	1.5	3.5	32.79	1.90417	1.836	7.23	2.65	0.945	1.09	0.72	0.232519	0.0644647	0.00616
Cg	912	1.08	0.36	3.25	3.75	9.9	2.92778	0.688	6.21	4.455	0.715	0.03	1.14	0.29383	0.0580749	0.04
Cg	912	1.03	0.36	1	2.25	20.77	3.76528	0.728	6.49	4	0.64	0.09	0.9	0.307726	0.0878774	0.00616
Cg	912	1.01	0.26	3.75	4.25	10.44	3.67222	0.72	5.97	4	0.855	0.09	0.87	0.299621	0.056464	0.01056									1
Cg	912	1.14	0.28	6	5	14.29	3.76528	0.968	6.38	3.84	0.555	0.13	0.75	0.287292	0.0602901	0.05456
Cg	912	1.05	0.33	6	12.25	16.79	4.41667	1.028	6.02	4.36	0.545	0.05	0.76	0.373572	0.0427131	0.03696		1
Cg	1003	0.971175	0.349157	7	7.25	75.7795	5.81509	1.664	7.93	4.45	1.85	0.82	1	0.4859	0.236374	0.05
Cg	1003	1.21352	0.299426	5	11	6.27325	3.79245	0.44	6.86	4.89	1.7	0.9	1.8	0.3357	0.267174	0.079647
Cg	1003	0.997087	0.370028	6	14.5	18.0295	5.30943	0.848	6.01	4.6	1.45	0.75	0.76	0.4412	0.281177	0.031769
Cg	1003	1.15282	0.285242	1.75	6.25	14.6264	4.55094	0.64	6.24	6.075	2	0.87	0.9	0.3221	0.28	0.05
Cg	1003	1.21911	0.321843	9	10.5	10.192	4.80377	0.676	6.54	4.555	2.05	0.64	0.65	0.2995	0.28	0.0764837									1
Cg	1003	1.05417	0.312558	15	16.5	64.642	5.56226	0.776	6.32	4.89	1.05	0.76	1.2	0.4569	0.213761	0.05
Cg	1003	1.21721	0.273	8	15.5	16.1732	4.04528	0.912	6.42	5.6	1.415	0.94	1.1	0.2814	0.276122	0.0052923
Cg	1003	1.18386	0.351092	1.05	1.65	28.5482	5.0566	0.668	6.16	5.01	1	0.8	0.98	0.396	0.276905	0.0548628		3							8
Cg	1003	1.06838	0.21342	7	10	20.917	3.79245	1.22	7.17	4.575	1.45	0.83	1.4	0.2702	0.28	0.0857601									4
Cg	1003	1.12862	0.326263	10.5	17	24.5264	4.04528	0.424	6.55	4.915	1.505	0.64	0.33	0.3662	0.28	0.0053198		1							1
Cg	1003	1.03786	0.45935	0.8	8	19.0607	6.32075	0.616	6.07	5.1	0.945	0.86	1.22	0.2761	0.365415	0.05
Cg	1003	1.09475	0.389763	0.3	0.25	4.417	4.55094	0.488	6.62	5.6	0.6	1.02	1	0.3247	0.301291	0.05
Cg	1003	1.16196	0.349672	1.75	5.5	8.9545	5.81509	0.448	6.13	5	0.85	1.23	1.08	0.3798	0.278194	0.0464503									1
Cg	1003	1.08015	0.359778	1.5	4.5	2.56075	4.55094	0.416	6.83	5.25	0.65	0.87	1.3	0.3199	0.28	0.0669456
Cg	1003	1.06805	0.440025	1.2	4.5	12.667	6.57358	0.724	6.32	5	0.595	0.96	1.12	0.4226	0.28	0.0678838
Cg	1006	1.30153	0.385902	0	2.5	6.22938	6.84889	0.3304	6.82	6.075	1.9	0.67	0.98	0.26242	0.15	0.0647778				2			1		5
Cg	1006	1.14888	0.368195	0	1.75	7.04574	5.36	0.258	6.1	5.075	1.85	0.8	1.89	0.44603	0.15	0.0818889
Cg	1006	1.37828	0.366465	0	2.75	4.80075	3.87111	0.3684	6.67	5.125	2.05	0.79	1.4	0.24282	0.0997721	0.0272381									19
Cg	1006	1.26864	0.375272	0	0.75	7.24983	4.76444	0.2976	6.28	5	2	0.86	0.98	0.41316	0.183059	0.1	1
Cg	1006	1.21564	0.387416	0	1	0.92304	5.95556	0.258	6.1	5.05	2.1	1.4	0.7	0.34012	0.14	0.102667
Cg	1006	1.24147	0.393817	0	0.5	1.12713	5.36	0.3092	5.57	5.625	1.45	0.66	1.05	0.29407	0.15	0.150333
Cg	1006	1.00898	0.435086	0	1.75	38.6797	6.25333	0.3312	5.38	4.9	1.55	0.83	1.55	0.23585	0.21	0.157667
Cg	1006	1.17531	0.448553	0	0.75	50.1087	7.44444	0.2664	5.91	4.79	1.6	0.7	1.1	0.39474	0.14718	0.052381		3							8
Cg	1006	1.28777	0.421995	0	0.5	30.5161	4.46667	0.3012	5.94	5.075	1	0.78	1.3	0.26713	0.154531	0.1									4
Cg	1006	1.06462	0.417351	0	1	3.16803	5.95556	0.3092	5.51	5.1	1.6	0.91	0.78	0.29167	0.13	0.0672222		1							1
Cg	1006	1.35658	0.141029	0.5	1.5	3.16803	6.55111	0.3204	5.84	4.45	1.175	0.86	1.1	0.37531	0.15	0.0481905									7
Cg	1006	0.872267	0.448164	0.5	1.25	4.18848	7.74222	0.3664	5.8	4.35	0.65	1.3	0.89	0.35078	0.19	0.0941111									3
Cg	1006	1.19196	0.465957	1.25	3.25	1.94349	8.63556	0.3092	5.88	4.075	1.05	0.75	0.97	0.4723	0.158174	0.0647778									1
Cg	1006	1.05832	0.46	0	1.25	5.20893	6.25333	0.3448	5.99	4.675	0.8	0.78	1.77	0.40761	0.12655	0.1
Cg	1006	1.03978	0.428273	0	0	3.37212	6.84889	0.2716	6.05	4.55	0.7	1.02	1.4	0.47409	0.12	0.277444	1			1
Cg	1009	1.19018	0.267669	5	12	3.64054	4.04528	0.2128	5.72	4.575	1.05	1	1.5	0.2975	0.157	0.044						3			2
Cg	1009	1.04812	0.372216	7.5	9	7.1904	6.7	0.2316	5.75	5.3	0.85	0.75	1.7	0.2941	0.17	0.1672	1
Cg	1009	1.16466	0.267096	4.5	3.5	4.19738	4.29811	0.1448	5.9	4.875	1	0.8	0.93	0.1982	0.139	0.033
Cg	1009	1.17499	0.240569	2.5	4	4.33659	3.28679	0.2904	7.29	5.5	1	0.9	1	0.2088	0.141	0.0572	1	6
Cg	1009	1.00833	0.380055	0.5	3.5	3.36212	5.68868	0.1468	5.53	6.05	0.525	0.66	0.98	0.3203	0.164	0.1034	4								2
Cg	1009	1.12625	0.304467	3	3	11.9235	4.55094	0.1368	5.6	5.1	0.95	0.55	1.13	0.2359	0.162	0.0176		1							14
Cg	1009	1.06752	0.423484	0	2	4.82383	5.68868	0.156	5.55	4.525	1.025	0.92	1.6	0.2853	0.114	0.0022		8					1		3
Cg	1009	1.18544	0.389293	6.5	3.5	4.4062	5.43585	0.1564	4.92	4.85	0.85	0.8	1.56	0.2867	0.119	0.0616		5							5
Cg	1009	1.09607	0.295032	1.5	3.5	7.81684	3.53962	0.2412	7.77	5.45	1.05	1.3	1	0.2523	0.139	0.0616							3		9
Cg	1009	1.20294	0.3306	3.5	4	5.7983	4.04528	0.104	5.22	5.5	1.15	1.05	0.9	0.188	0.169	0.0616		6							4
Cg	1009	1.11882	0.351223	0	0.5	5.24146	4.55094	0.2488	7.06	4.475	0.75	0.9	1.7	0.2948	0.149	0.1386									1
Cg	1009	0.99268	0.37399	0	0	5.51987	5.56226	0.1352	5.24	5	0.83	1.2	0.96	0.4254	0.182	0.0506									5
Cg	1009	1.07456	0.367403	1	3.5	4.33659	6.19434	0.1472	6.36	4.15	0.725	0.95	1	0.3741	0.158	0.0154
Cg	1009	1.02708	0.449062	0.5	3.5	4.05817	6.32075	0.1508	5.89	4.725	1.08	0.95	1.65	0.3363	0.166	0.0748								2
Cg	1009	1.13178	0.349352	0	6	3.36212	5.94151	0.1672	5.5	4.9	1	1.07	1.3	0.327	0.18	0.0572									3
Cg	1012	1.19971	0.251288	4.5	4.5	5.21825	3.14062	0.4828	6.07	4.6	1.45	0.9	1.78	0.2754	0.093	0.00565714
Cg	1012	1.0665	0.25438	2	1.5	3.38532	5.23438	0.5048	5.48	5.25	1.4	1.25	1.65	0.293	0.18	0.00737143									2
Cg	1012	1.13846	0.240279	0	2	2.20204	1.675	0.5088	6.32	4.725	1.55	1.1	1.2	0.2462	0.147	0.0048
Cg	1012	1.08368	0.224259	0.5	0	3.82615	5.025	0.488	5.9	4.85	1.25	0.89	0.8	0.2494	0.147	0.00651429
Cg	1012	1.19368	0.169993	1	7	1.87721	2.93125	0.454	6.47	5.05	1.015	0.67	0.65	0.1956	0.102	0.00565714
Cg	1012	1.06116	0.205671	4.5	4.5	8.97692	3.97812	0.4024	5.8	6.55	1	0.66	1	0.3369	0.095	0.00822857
Cg	1012	1.05772	0.292009	8	9	8.14166	4.39687	0.3872	5.71	4.675	1.1	1.1	1.25	0.3169	0.181	0.00394286									2
Cg	1012	1.12429	0.237427	5	7.5	14.1277	3.14062	0.462	6.3	5.4	1.33	0.7	1.1	0.245	0.144	0.0048		1							1
Cg	1012	0.828877	0.2307	0	0.5	5.68229	3.97812	0.412	5.9	5.6	1.45	0.77	0.68	0.2229	0.12	0.00737143									3
Cg	1012	1.12299	0.273728	3.5	3	4.75422	5.23438	0.5076	5.68	4.85	1.6	0.9	0.87	0.2907	0.135	0.00565714
Cg	1012	1.05388	0.260467	7.5	8	9.06973	4.60625	0.428	5.63	4.445	0.85	1	1.2	0.2595	0.145	0.00565714
Cg	1012	1.12608	0.187506	4.5	8.5	8.74491	3.55938	0.4856	6.36	5.1	0.85	1.1	0.65	0.2382	0.103	0.00651429
Cg	1012	1.03659	0.260857	2.5	2	7.35281	3.76875	0.3212	6.12	4.575	0.925	1.05	0.9	0.2207	0.152	0.00651429									1
Cg	1012	1.08221	0.270006	3.5	4.5	4.01177	5.23438	0.3144	6.15	4.825	0.95	0.65	1.3	0.2824	0.112	0.00308571
Cg	1012	1.27938	0.223271	6.5	6.5	3.64054	4.1875	0.4232	6.21	5.35	1.025	0.95	1.15	0.235	0.144	0.00651429		1
Ag	808	1.08857	0.287035	0.0001	8	14.7	4.4196	0.64	6	6.5	2.06	0.65	1.25	0.2952	1.2545	0.0332787	3				1
Ag	808	1.169	0.273249	10	10	13.2	3.654	0.616	6.3	6.49	2.175	0.78	1.36	0.2952	1.1698	0.0277323	5	3	4
Ag	808	1.32197	0.24546	8	8.5	15.24	3.7062	0.7	5.8	6.6	2.18	0.26	1.49	0.2952	1.1383	0.0388252	2	1			1
Ag	808	1.15545	0.264955	3.5	3.5	18.1	3.828	0.64	5.81	6.225	2.115	0.64	1.25	0.2952	1.11	0.03	2
Ag	808	1.21767	0.281934	8.5	8.25	16.7	4.2978	0.52	6.2	6.48	2.25	0.69	1.2	0.2952	1.11	0.03							1
Ag	808	1.25397	0.240258	4.5	4.5	20.19	4.4892	0.712	6.2	6	2	0.65	1	0.3039	1.0911	0.0605681	3	2				1
Ag	808	1.2497	0.272603	3	4.25	22.69	4.611	0.656	6.2	6.18	1.83	0.41	1.25	0.3039	1.1622	0.0110124	4
Ag	808	1.2299	0.281589	12	3.25	21.35	4.4196	0.6	6.45	6.05	2.05	0.42	1.1	0.2969	0.9539	0.0220248	3
Ag	808	1.3102	0.268949	3	3.5	24	4.1934	0.56	6.05	6.2	1.6	0.36	0.99	0.3252	1.11	0.03	4	1			1		1
Ag	808	1.17235	0.290418	3	4.25	23	5.046	0.656	6.3	6.175	1.825	0.33	0.87	0.3252	1.11	0.03	4				1
Ag	808	1.07956	0.22449	5.7	9.6	8.28	4.2804	0.92	5.9	6.115	2.115	0.69	0.96	0.276575	1.1995	0.0322187	3		1				1
Ag	808	1.16979	0.286895	7.1	8.75	8	3.7758	1.08	5.98	6.3	2.03	0.71	0.63	0.284	1.0213	0.0214791
Ag	808	0.87897	0.212121	4.1	6.9	5.6	3.8802	0.744	5.75	6.175	2.105	0.65	0.8	0.27	1.0433	0.0214791
Ag	808	1.14802	0.276352	6.25	4.75	9.6	4.176	0.724	6.45	6.445	2	0.39	0.92	0.3011	1.11	0.03	1		1
Ag	808	1.24799	0.231556	3.6	3.25	8.34	4.6806	0.676	5.81	6.05	2.06	0.7	0.64	0.2512	1.11	0.03
Ag	811	1.05588	0.220741	7.25	9.75	19.5	4.698	0.696	6.2	6.5	1.845	0.63	1	0.3439	0.193	0.0362
Ag	811	1.17018	0.154611	8.5	8	12.3	4.9938	0.64	6.3	6.395	1.89	0.52	1.2	0.2936	0.037	0.0362
Ag	811	1.27107	0.112692	6	7	14.6	4.5762	0.56	5.9	6.29	1.825	0.56	1.36	0.2661	0.225	0.0311		2
Ag	811	1.16479	0.15448	3.5	3.25	14.2	3.654	0.64	5.9	6.18	1.68	0.69	1.02	0.32235	0.23	0.04
Ag	811	1.179	0.162269	1.25	6.5	16.5	4.611	0.54	6.1	6.225	1.99	0.55	1.1	0.2587	0.23	0.04
Ag	811	1.35486	0.206301	4.5	4	16.4	5.1852	0.756	6.3	6.115	2	0.87	1.64	0.3516	0.22	0.0001
Ag	811	1.3227	0.193	6	6	19.6	4.4196	0.6664	6.12	6.175	2.015	0.96	1.26	0.3131	0.054	0.0686
Ag	811	1.23378	0.174787	2.75	5.5	17.8	4.5762	0.68	6.5	6.48	2.06	0.54	1.41	0.32465	0.368	0.1715
Ag	811	1.12165	0.197596	3.25	4.25	23.5	3.8454	0.6	6.1	5.89	1.98	0.89	1.72	0.29695	0.23	0.04		1
Ag	811	1.26199	0.24045	4	5.5	20.1	3.828	0.68	6.5	6.17	2.05	0.89	1.63	0.3751	0.23	0.04
Ag	811	1.13007	0.142001	2.5	4	33.5	3.828	0.92	5.23	6.05	1.825	0.64	1.1	0.29015	0.336	0.0001
Ag	811	1.26752	0.177814	2	2.5	30.6	4.5066	0.74	5.2	6.18	1.82	0.58	1.25	0.2494	0.149	0.0307
Ag	811	1.3788	0.174481	6	6.25	31.2	3.7758	0.686	5.35	6.1	1.845	0.62	1.24	0.2828	0.487	0.0001
Ag	811	1.09975	0.175996	1	1.5	37.9	4.0716	0.76	6.5	6.49	2.125	0.64	1.36	0.2175	0.23	0.04
Ag	811	1.24549	0.145316	0.0001	0.0001	38.5	4.002	1.2648	5.07	6.27	1.89	0.66	1.33	0.2446	0.23	0.04		1
Ag	902	1.08877	0.139293	9	11.5	29.4	2.19691	2.01	5.5	6.3	1.945	0.68	1.2	0.3962	0.146	0.0037
Ag	902	0.937831	0.127349	6	13.5	29.7	1.80733	2.36	5.28	7.28	2.28	0.74	1.1	0.3452	0.24	0.0704
Ag	902	1.11224	0.15622	8	10	25.6	1.727	2.44	5.5	6.65	1.875	0.71	1.1	0.316	0.244	0.03334
Ag	902	1.05661	0.141479	8	6	29	2.28929	1.24	5.3	6.45	1.89	0.63	1.5	0.3676	0.11	0.02
Ag	902	1.23233	0.155833	10	17.5	27.8	1.50695	2	4.95	5.9	1.975	0.65	1.3	0.2555	0.11	0.02			1
Ag	902	0.8987	0.129016	8	15	35	2.13363	1.65	5.2	5.29	2.115	0.78	1.5	0.3273	0.0001	0.0238
Ag	902	0.915734	0.142129	8.5	11.5	37.11	2.40148	1.4	5.1	5.735	1.945	0.83	1.63	0.2735	0.095	0.0306
Ag	902	1.09376	0.120919	8.5	9.5	36.9	2.40148	1.68	5.22	5.345	2.3	0.85	1.52	0.3242	0.008	0.0238			1
Ag	902	0.936253	0.120258	8	14	33.4	2.05451	1.96	5.39	5.8	1.725	0.81	1.49	0.3127	0.11	0.02
Ag	902	1.01833	0.112116	6.5	11	30	2.03992	1.56	5	6.15	1.825	0.94	1.47	0.4078	0.11	0.02
Ag	902	1.37432	0.15385	12.5	19	36.5	2.1996	1.595	5.16	6.375	1.9	0.7	1.23	0.3273	0.064	0.0186
Ag	902	1.10935	0.164157	13	16	30.14	1.97454	3.06	4.79	6.95	2.1	0.73	1.12	0.2653	0.099	0.0112
Ag	902	1.2983	0.142445	5	6.75	31.65	1.54557	0.84	5.16	7.05	1.87	0.71	1.56	0.257	0.057	0.0001
Ag	902	1.01399	0.134518	9	16	32.5	2.03128	1.52	5.03	6.365	2.25	0.66	1.98	0.3316	0.11	0.02			2
Ag	902	1.25173	0.131561	19.5	28	33.6	1.97884	0.96	5.34	6.28	2	0.65	1.41	0.2726	0.11	0.02
Ag	905	1.28574	0.262762	3.25	5.5	23.6	2.41557	0.716	5.65	6.55	2.05	0.71	1.1	0.2916	0.0193	0.0425
Ag	905	1.09764	0.254344	4	4.25	23.8	2.31402	0.728	5.5	7.25	1.825	0.63	1.23	0.242	0.0473	0.0316
Ag	905	1.44141	0.251038	2.75	4.75	24.7	2.61096	0.892	5.5	6.5	2.1	0.72	1.22	0.2907	0.0272	0.0316
Ag	905	1.31467	0.258629	2.5	4	22.6	2.53846	1.012	5.45	6.4	1.95	0.62	1.6	0.2771	0.05	0.1025
Ag	905	1.27278	0.236707	4.5	4.5	29.1	2.23041	0.732	5.5	5.6	1.9	0.65	1.74	0.2619	0.05	0.0262			1	1
Ag	905	1.20353	0.30235	3.25	5.2	31.4	2.42764	1.012	5.6	5.6	2	0.69	1.52	0.3759	0.0226	0.0492	9		5
Ag	905	1.33473	0.272235	3.5	3.25	34.6	2.57941	0.956	5.9	6.05	2.35	0.66	1.63	0.3527	0.0495	0.189
Ag	905	1.36794	0.255769	5.5	6	30.76	2.48975	0.9	5.6	5.705	2.105	0.54	1.8	0.3251	0.0173	0.0324	2	1	1				1
Ag	905	1.36078	0.277415	2.25	3.25	32.6	2.69646	0.744	5.6	5.95	2.15	0.78	1.64	0.2812	0.05	0.0212		5
Ag	905	1.29922	0.255631	2.75	3.25	35.8	2.35327	0.776	5.8	6.15	2	0.98	1.7	0.3424	0.0303	0.0324		1	4
Ag	905	1.33789	0.231873	1.75	2.75	28.7	2.49188	0.844	5.6	6.15	1.845	0.69	1.3	0.253	0.0337	0.0315			2
Ag	905	1.34164	0.251716	1	1.5	26.1	2.37626	1.304	5.5	6	1.77	0.7	1.32	0.2677	0.285	0.037		1
Ag	905	1.22326	0.261452	2	4	29.5	2.47712	0.82	5.5	6.4	1.85	0.66	1	0.2633	0.0387	0.0261	1
Ag	905	1.30875	0.250854	0.5	2.25	20.5	2.62686	0.76	5.8	5.935	1.935	0.8	1.1	0.2061	0.05	0.0424	3
Ag	905	1.42135	0.253609	1.75	2.5	22.8	2.41164	0.948	5.4	6.15	1.815	0.71	1.23	0.2509	0.0225	0.0315	2	1	1	1
Ag	908	1.30526	0.214415	2.75	6	1.4703	4.77	0.58	6.19	6.495	2.055	0.66	1.11	0.2964	0.0332787	0.03						1
Ag	908	1.33329	0.219974	8.5	9.25	2.2806	3.83	0.528	6.18	6.778	2.099	0.666	1.218	0.22643	0.0277323	0.03		2
Ag	908	1.29283	0.208285	9.5	14	2.8208	4.56	0.568	6.21	6.583	2.046	0.58	1.238	0.29	0.0388252	0.0233488
Ag	908	1.20211	0.185639	14	13.5	2.0105	4.74	0.544	6.32	6.281	1.939	0.706	1.374	0.35251	0.03	0.03
Ag	908	1.42961	0.218316	3	6.5	3.361	4.14	0.588	6.14	6.041	2.073	0.598	1.224	0.28054	0.03	0.0258499
Ag	908	1.31487	0.223556	2.5	4	7.4125	5.12	0.708	6.16	5.826	2.033	0.688	1.332	0.15593	0.0605681	0.03			12
Ag	908	1.24553	0.240968	5	6.5	8.763	5.2	0.468	5.95	6.103	2.024	0.696	1.354	0.35044	0.0110124	0.03
Ag	908	1.2923	0.339103	4	5	10.2486	5.35	0.708	6.09	5.841	2.068	0.6	1.356	0.31492	0.0220248	0.027436		4
Ag	908	1.41322	0.152833	3.5	5.5	9.50578	3.81	0.504	6.27	5.913	1.791	0.65	1.324	0.33274	0.03	0.0164657		1
Ag	908	1.23296	0.230137	7	7.75	7.1424	5.19	0.84	5.74	6.065	1.894	0.696	1.312	0.34115	0.03	0.03		1
Ag	908	1.28829	0.283015	1.75	4.75	11.329	4.48	0.6	5.97	6.163	1.937	0.666	1.114	0.29837	0.0322187	0.03		5
Ag	908	1.22059	0.233439	4	7	6.66973	3.89	0.488	6.1	6.331	1.949	0.71	1.014	0.3498	0.0214791	0.03		2
Ag	908	1.20783	0.273163	6.75	9.5	11.1264	4.04	0.572	5.92	6.381	1.944	0.684	1.09	0.18945	0.0214791	0.0349528			1
Ag	908	1.25467	0.275444	4.25	4.5	8.02022	4.36	0.516	6.14	6.342	2.065	0.588	1.254	0.26479	0.03	0.0460251		6
Ag	908	1.3125	0.250827	3.5	6.25	3.0909	5.33	0.556	6.4	6.15	1.953	0.688	1.074	0.29	0.03	0.0271672		1					2
Ag	912	0.933233	0.07	7	6.75	7.61387	6.65315	0.648	6.01	5.65	0.82	0.06	2	0.285967	0.26	0.09
Ag	912	1.23197	0.19162	0.0001	0.0001	12.1514	6.37203	0.524	5.71	7.5	1.14	0.08	3.4	0.31116	0.26	0.26136
Ag	912	0.895642	0.168464	4.5	7	26.4858	5.43497	0.512	6.85	5.88	0.84	0.03	2.13	0.25556	0.26	0.21736
Ag	912	0.953111	0.125364	3	4.25	9.26388	5.9035	0.504	5.77	5.545	0.8	0.08	2.78	0.37598	0.26	0.06336
Ag	912	0.963115	0.141688	2.5	5.25	26.4858	7.30909	0.536	6.33	6.6	0.99	0.09	2.5	0.260424	0.26	0.04136
Ag	912	1.23955	0.237684	2	2.75	5.6545	5.15385	0.632	5.46	4.1	0.545	0.07	1.18	0.317161	0.26	0.09
Ag	912	1.17329	0.0700945	2.25	3.25	5.6545	5.62238	0.492	5.52	4.5	0.49	0.12	1.18	0.437302	0.26	0.13376
Ag	912	1.29914	0.136109	3.25	4.75	9.26388	4.87273	0.66	5.49	4.88	0.7	0.09	1.4	0.317266	0.26	0.01496
Ag	912	1.28896	0.215133	4	5	10.5014	5.62238	0.548	5.44	4.86	0.805	1.1	1.34	0.27634	0.26	0.02816
Ag	912	1.16025	0.209324	3.25	4.75	6.892	6.09091	0.544	5.43	4.67	0.605	0.09	1.32	0.31909	0.26	0.15576
Ag	912	1.10781	0.192651	1	2.5	11.05	4.4979	1.14	5.83	6.55	1.12	0.05	2.5	0.262674	0.26	0.09
Ag	912	1.20282	0.188738	1.5	1.5	15.6576	6.65315	0.608	5.61	8.15	1.355	0.08	2.33	0.256497	0.26	0.02816
Ag	912	1.03938	0.372583	2	6.25	54.6389	5.71608	0.74	5.77	6.45	1.445	0.09	2.1	0.269039	0.26	0.05896
Ag	912	1.19849	0.162318	4.5	5.5	24.42	6.09091	0.928	5.9	5.85	1.015	0.02	2.9	0.289045	0.26	0.03696
Ag	912	1.15566	0.190819	2	5	24.4232	5.9035	0.64	5.87	6.25	0.89	0.19	2.89	0.235368	0.26	0.05016
Ag	1003	1.26048	0.212251	6.5	11	1.52	5.11636	0.872	6.03	5.945	0.475	0.79	1.2	0.3282	0.280358	0.04	6			2
Ag	1003	1.1663	0.245066	2	6	4.417	5.11636	0.652	5.91	5.75	0.665	1.2	1.6	0.3557	0.279205	0.026341	3
Ag	1003	1.21168	0.275727	2	3.5	1.942	5.11636	0.5	6.6	6.1	0.445	0.8	2.03	0.2858	0.41331	0.07		3
Ag	1003	1.24371	0.24885	4	5	0.08575	4.87273	0.552	6.1	5.5	0.505	0.72	2.6	0.3482	0.31	0.0859079
Ag	1003	1.09422	0.244981	7	6	0.1	4.38545	0.748	6.83	6.05	0.875	0.67	1.52	0.3315	0.31	0.0734207
Ag	1003	1.11645	0.296301	1	2	4.52013	5.11636	0.692	6.06	3.9	1.025	0.9	1.3	0.3327	0.32194	0.04	2			11
Ag	1003	1.16703	0.257988	4.5	5	3.592	4.38545	0.668	5.52	4.6	0.85	0.85	1.55	0.3182	0.300632	0.0199118	4
Ag	1003	1.2278	0.21142	5.5	9.5	0.1	4.87273	0.692	6.65	5.05	0.8	1.01	1.9	0.3812	0.397344	0.0756187	4	11
Ag	1003	1.17663	0.214801	3.5	3.5	2.97325	4.87273	0.66	6.18	4.775	0.485	0.7	1.2	0.354	0.31	0.04	6
Ag	1003	1.28712	0.236575	1.5	2.5	6.4795	4.62909	0.736	6.23	4.65	0.55	0.85	1.6	0.3061	0.31	0.0737107
Ag	1003	1.24141	0.214982	0.75	4	1.83888	3.89818	0.604	6.89	6.25	1	0.56	2	0.2835	0.163607	0.04
Ag	1003	1.15341	0.242787	4	4.5	0.7045	4.38545	0.516	6.07	6.275	1.425	0.67	1.7	0.2063	0.284046	0.0262781
Ag	1003	1.16782	0.202061	0.5	2.25	2.87012	4.38545	0.452	7.05	5.95	1.325	0.63	2.06	0.319	0.37234	0.0094624		5
Ag	1003	1.29928	0.229905	2.25	1.5	0.292	3.89818	0.632	5.86	6.85	1	0.71	2.1	0.3283	0.31	0.04	4
Ag	1003	1.30321	0.248641	1.25	1.75	0.1	3.65455	0.468	5.84	7.075	0.885	0.8	1.66	0.2314	0.31	0.0052431
Ag	1006	1.19939	0.347042	5	7.25	4.80075	7.02951	0.356	6.34	6.8	1.3	0.67	1.1	0.36458	0.1	0.0647778
Ag	1006	1.47581	0.299153	6	10.5	3.16803	6.37049	0.2604	6.26	5.85	0.95	0.77	1.75	0.31484	0.11	0.0501111
Ag	1006	1.30561	0.36752	0	3.5	6.22938	7.24918	0.3132	6.22	6.5	1.51	0.73	1.96	0.33365	0.0869435	0.00611111
Ag	1006	1.20308	0.351665	5.75	8.5	4.80075	2.36	0.3236	6.43	6.7	1.625	0.65	2.3	0.3295	0.0658255	0.07
Ag	1006	1.25529	0.316341	3.5	9.75	3.37212	6.37049	0.292	6.27	6.175	1.225	0.61	1.66	0.33981	0.12	0.108778
Ag	1006	1.20347	0.313569	5.5	7.5	0.1	6.80984	0.2812	5.96	4.7	1.08	0.81	1.76	0.30723	0.1	0.108778	3
Ag	1006	1.13411	0.358261	5	8	0.71895	2.36	0.3596	6.25	4.75	1.175	0.64	1.4	0.42095	0.17	0.0965556	4
Ag	1006	1.21315	0.354057	5.5	5	0.1	9.22623	0.3172	6.3	4.525	0.95	0.9	1.89	0.31294	0.1	0.0525556	12
Ag	1006	1.18369	0.352922	3.5	7	0.10668	5.4918	0.3112	6.14	4.55	0.945	0.63	1.95	0.4156	0.0936564	0.07	3
Ag	1006	1.21282	0.348405	8	8.25	0.1	5.71148	0.274	5.9	4.5	1	0.76	1.8	0.36	0.14	0.174778	6
Ag	1006	1.16098	0.314564	6.5	8	7.65801	6.59016	0.3692	6.17	6	1.505	0.56	2.66	0.26146	0.1	0.0230476	5						2
Ag	1006	1.15125	0.315853	7	10	3.7803	6.37049	0.2692	6.37	6.5	1.375	0.62	1.89	0.30869	0.08	0.0607619	3
Ag	1006	1.2528	0.308205	3.75	13.25	2.55576	6.15082	0.2356	6.32	5.9	1.125	0.78	2.5	0.31987	0.0471307	0.0941111	6
Ag	1006	1.16381	0.297355	4.25	6.5	5.8212	6.37049	0.3236	6.56	6	1.4	0.75	1.96	0.31413	0.07526	0.07	6
Ag	1006	1.26661	0.287969	4.25	7	5.00484	6.80984	0.3328	6.38	6.25	1.51	0.81	2	0.28695	0.07	0.0427778		2		2			1
Ag	1009	1.26028	0.270782	8	14	5.10225	6.06792	0.2276	5.99	6.25	1.55	0.8	1.45	0.306	0.165	0.0748
Ag	1009	1.21852	0.29361	2	5	7.19039	6.06792	0.11	6.21	6.6	0.98	0.65	1.89	0.2695	0.191	0.0792
Ag	1009	1.18571	0.296578	10.5	13	2.38765	3.79245	0.1428	6.4	6.05	1.475	0.76	1.3	0.1881	0.194	0.011
Ag	1009	1.23812	0.294805	15	16	3.64054	5.0566	0.1624	5.92	6.575	1.415	0.9	2	0.2122	0.161	0.231	7
Ag	1009	1.2034	0.30129	7	11	2.94449	5.0566	0.164	5.97	6.275	1.05	0.89	1.9	0.2147	0.166	0.0022
Ag	1009	1.15105	0.272769	8.5	16	4.05817	5.18302	0.2036	5.66	5.01	1.075	1.01	2.13	0.2835	0.148	0.0396	11						2
Ag	1009	1.23687	0.2523	11	13	4.68461	4.80377	0.142	5.81	4.9	1.1	0.67	1.76	0.2137	0.125	0.033
Ag	1009	1.14381	0.248505	15.5	15.5	8.93052	5.30943	0.1624	5.88	5.15	1	1	2.4	0.2471	0.158	0.0088	6
Ag	1009	1.17025	0.272395	10	14.5	5.17185	5.30943	0.1296	5.94	5.1	0.95	0.65	1.9	0.2847	0.152	0.0066
Ag	1009	1.31888	0.253565	14	15.5	9.83539	5.30943	0.1768	5.86	4.75	0.99	0.88	1.1	0.3212	0.132	0.3014		2					1
Ag	1009	1.24687	0.24015	12.5	16	7.60803	5.18302	0.2424	5.7	7	1.6	0.77	2.1	0.2935	0.143	0.0484	10						2
Ag	1009	1.24102	0.246317	9	10.5	3.0837	3.66604	0.1528	5.83	7.275	1.225	1.05	1.66	0.2593	0.15	0.0132	3
Ag	1009	1.17334	0.344263	13.5	15.5	4.54541	4.1717	0.1196	5.91	6.8	1.15	0.98	2	0.1711	0.108	0.0308	6
Ag	1009	1.21175	0.246621	9	9	4.89343	4.29811	0.1556	5.93	6.55	1.625	0.98	1.09	0.236	0.178	0.055
Ag	1009	1.26647	0.153087	8	12.5	4.54541	4.80377	0.1236	5.86	7.5	1.375	1.1	1.78	0.2833	0.011	0.066		2		2			1
Ag	1012	1.12963	0.18183	11	18	6.88877	4.39687	0.522	5.3	6.5	1.5	0.9	1.8	0.1982	0.161	0.00651429
Ag	1012	1.14395	0.197703	6	10.5	6.65676	5.025	0.5132	5.71	6.5	1.51	0.78	1.44	0.3098	0.141	0.00737143
Ag	1012	1.23529	0.198467	7.5	10	17.1903	4.39687	0.4392	5.24	6.2	1.85	0.65	1.56	0.2064	0.122	0.0133714
Ag	1012	1.25244	0.200729	7.5	9	6.33193	5.44375	0.4872	6.05	6.6	1.3	0.8	2.15	0.2899	0.141	0.0048
Ag	1012	1.15149	0.193374	9	14.5	4.89343	4.39687	0.7264	4.92	6.9	1.45	0.9	1.73	0.2909	0.191	0.00822857
Ag	1012	1.22787	0.143905	4.5	13	7.16719	3.76875	0.106	5.3	5.2	1.475	1.2	2	0.1998	0.104	0.00908571
Ag	1012	1.35911	0.138083	9.5	11	5.12545	3.97812	0.2604	5.51	5	1	0.65	1.9	0.1942	0.074	0.0150857
Ag	1012	1.23205	0.167674	2.5	20	7.63123	3.97812	0.1876	4.96	5.65	0.9	0.97	2.1	0.3512	0.092	0.00908571
Ag	1012	0.99512	0.140071	4.5	19	13.7565	4.1875	0.2384	5.32	5.6	1.175	0.7	2.1	0.3052	0.126	0.0228
Ag	1012	1.08042	0.149512	4	13	5.21825	5.44375	0.1316	5.03	5.3	1.05	0.9	1.44	0.2684	0.129	0.0150857
Ag	1012	1.09552	0.104697	9.25	17	11.2043	4.1875	0.2904	6.44	6.8	1.575	0.81	1.67	0.1957	0.113	0.00822857
Ag	1012	1.13751	0.117283	11	15.75	6.51755	2.30313	0.2436	6.24	8.05	1.35	1.15	1.9	0.1799	0.13	0.0048
Ag	1012	1.42732	0.160476	13	18.5	4.84703	2.93125	0.268	7.36	7.5	1.225	0.9	1.89	0.2374	0.108	0.0125143
Ag	1012	1.25481	0.177912	10	14.5	6.88877	2.5125	0.2224	5.96	7.15	1.9	0.76	1.93	0.2014	0.111	0.00908571
Ag	1012	1.29116	0.154116	4	8.5	4.98624	2.5125	0.232	5.93	8.1	1.725	0.94	2.05	0.1954	0.147	0.00737143
Ag	Agricultural fields with at least 50 years of continuous intensive agriculture
Cg	Cattle grazing fields, turned into agriculture 2 years prior of the start of the study
Ng	Naturalized Grasslands. Fields with at least 50 years with no significant anthropic impact
MR	Mechanical Resistance to penetration. First 0-5 cm, and then 5-10 cm
OM	Organic Matter in the soil sample
EC	Electrical Conductivity
Analysis at the Species level excludes non-clitelated individuals

## Sheet: Genus
See below for acronyms			Physical				Chemical									Biological
System	Genus	indiv/sample	Bulk Density	Rel. Humidity	MR 0-5	MR 5-10	P	OM	EC	Ph	Ca	Mg	Na	K	N	Enzymatic Activity	Respiration
Ag	Aporectodea	6	1.08857	0.287035	0.0001	8	14.7	4.4196	0.64	6	6.5	2.06	0.65	1.25	0.2952	1.2545	0.0332787
Ag	Aporectodea	2	1.15545	0.264955	3.5	3.5	18.1	3.828	0.64	5.81	6.225	2.115	0.64	1.25	0.2952	1.11	0.03
Ag	Aporectodea	7	1.2497	0.272603	3	4.25	22.69	4.611	0.656	6.2	6.18	1.83	0.41	1.25	0.3039	1.1622	0.0110124
Ag	Aporectodea	11	1.2299	0.281589	12	3.25	21.35	4.4196	0.6	6.45	6.05	2.05	0.42	1.1	0.2969	0.9539	0.0220248
Ag	Aporectodea	6	1.17235	0.290418	3	4.25	23	5.046	0.656	6.3	6.175	1.825	0.33	0.87	0.3252	1.11	0.03
Ag	Aporectodea	7	1.22326	0.261452	2	4	29.5	2.47712	0.82	5.5	6.4	1.85	0.66	1	0.2633	0.0387	0.0261
Ag	Aporectodea	12	1.30875	0.250854	0.5	2.25	20.5	2.62686	0.76	5.8	5.935	1.935	0.8	1.1	0.2061	0.05	0.0424
Ag	Aporectodea	10	1.26048	0.212251	6.5	11	1.52	5.11636	0.872	6.03	5.945	0.475	0.79	1.2	0.3282	0.280358	0.04
Ag	Aporectodea	16	1.1663	0.245066	2	6	4.417	5.11636	0.652	5.91	5.75	0.665	1.2	1.6	0.3557	0.279205	0.026341
Ag	Aporectodea	9	1.11645	0.296301	1	2	4.52013	5.11636	0.692	6.06	3.9	1.025	0.9	1.3	0.3327	0.32194	0.04
Ag	Aporectodea	18	1.16703	0.257988	4.5	5	3.592	4.38545	0.668	5.52	4.6	0.85	0.85	1.55	0.3182	0.300632	0.0199118
Ag	Aporectodea	8	1.17663	0.214801	3.5	3.5	2.97325	4.87273	0.66	6.18	4.775	0.485	0.7	1.2	0.354	0.31	0.04
Ag	Aporectodea	4	1.29928	0.229905	2.25	1.5	0.292	3.89818	0.632	5.86	6.85	1	0.71	2.1	0.3283	0.31	0.04
Ag	Aporectodea	3	1.20347	0.313569	5.5	7.5	0.1	6.80984	0.2812	5.96	4.7	1.08	0.81	1.76	0.30723	0.1	0.108778
Ag	Aporectodea	4	1.13411	0.358261	5	8	0.71895	2.36	0.3596	6.25	4.75	1.175	0.64	1.4	0.42095	0.17	0.0965556
Ag	Aporectodea	12	1.21315	0.354057	5.5	5	0.1	9.22623	0.3172	6.3	4.525	0.95	0.9	1.89	0.31294	0.1	0.0525556
Ag	Aporectodea	3	1.18369	0.352922	3.5	7	0.10668	5.4918	0.3112	6.14	4.55	0.945	0.63	1.95	0.4156	0.0936564	0.07
Ag	Aporectodea	6	1.21282	0.348405	8	8.25	0.1	5.71148	0.274	5.9	4.5	1	0.76	1.8	0.36	0.14	0.174778
Ag	Aporectodea	5	1.16098	0.314564	6.5	8	7.65801	6.59016	0.3692	6.17	6	1.505	0.56	2.66	0.26146	0.1	0.0230476
Ag	Aporectodea	3	1.15125	0.315853	7	10	3.7803	6.37049	0.2692	6.37	6.5	1.375	0.62	1.89	0.30869	0.08	0.0607619
Ag	Aporectodea	11	1.2528	0.308205	3.75	13.25	2.55576	6.15082	0.2356	6.32	5.9	1.125	0.78	2.5	0.31987	0.0471307	0.0941111
Ag	Aporectodea	6	1.16381	0.297355	4.25	6.5	5.8212	6.37049	0.3236	6.56	6	1.4	0.75	1.96	0.31413	0.07526	0.07
Ag	Aporectodea	7	1.23812	0.294805	15	16	3.64054	5.0566	0.1624	5.92	6.575	1.415	0.9	2	0.2122	0.161	0.231
Ag	Aporectodea	11	1.15105	0.272769	8.5	16	4.05817	5.18302	0.2036	5.66	5.01	1.075	1.01	2.13	0.2835	0.148	0.0396
Ag	Aporectodea	10	1.14381	0.248505	15.5	15.5	8.93052	5.30943	0.1624	5.88	5.15	1	1	2.4	0.2471	0.158	0.0088
Ag	Aporectodea	10	1.24687	0.24015	12.5	16	7.60803	5.18302	0.2424	5.7	7	1.6	0.77	2.1	0.2935	0.143	0.0484
Ag	Aporectodea	3	1.24102	0.246317	9	10.5	3.0837	3.66604	0.1528	5.83	7.275	1.225	1.05	1.66	0.2593	0.15	0.0132
Ag	Aporectodea	6	1.17334	0.344263	13.5	15.5	4.54541	4.1717	0.1196	5.91	6.8	1.15	0.98	2	0.1711	0.108	0.0308
Ag	Aporectodea	2	1.27107	0.112692	6	7	14.6	4.5762	0.56	5.9	6.29	1.825	0.56	1.36	0.2661	0.225	0.0311
Ag	Aporectodea	1	1.12165	0.197596	3.25	4.25	23.5	3.8454	0.6	6.1	5.89	1.98	0.89	1.72	0.29695	0.23	0.04
Ag	Aporectodea	1	1.24549	0.145316	0.0001	0.0001	38.5	4.002	1.2648	5.07	6.27	1.89	0.66	1.33	0.2446	0.23	0.04
Ag	Aporectodea	5	1.36078	0.277415	2.25	3.25	32.6	2.69646	0.744	5.6	5.95	2.15	0.78	1.64	0.2812	0.05	0.0212
Ag	Aporectodea	1	1.34164	0.251716	1	1.5	26.1	2.37626	1.304	5.5	6	1.77	0.7	1.32	0.2677	0.285	0.037
Ag	Aporectodea	2	1.33329	0.219974	8.5	9.25	2.2806	3.83	0.528	6.18	6.778	2.099	0.666	1.218	0.22643	0.0277323	0.03
Ag	Aporectodea	4	1.2923	0.339103	4	5	10.2486	5.35	0.708	6.09	5.841	2.068	0.6	1.356	0.31492	0.0220248	0.027436
Ag	Aporectodea	1	1.41322	0.152833	3.5	5.5	9.50578	3.81	0.504	6.27	5.913	1.791	0.65	1.324	0.33274	0.03	0.0164657
Ag	Aporectodea	1	1.23296	0.230137	7	7.75	7.1424	5.19	0.84	5.74	6.065	1.894	0.696	1.312	0.34115	0.03	0.03
Ag	Aporectodea	5	1.28829	0.283015	1.75	4.75	11.329	4.48	0.6	5.97	6.163	1.937	0.666	1.114	0.29837	0.0322187	0.03
Ag	Aporectodea	2	1.22059	0.233439	4	7	6.66973	3.89	0.488	6.1	6.331	1.949	0.71	1.014	0.3498	0.0214791	0.03
Ag	Aporectodea	6	1.25467	0.275444	4.25	4.5	8.02022	4.36	0.516	6.14	6.342	2.065	0.588	1.254	0.26479	0.03	0.0460251
Ag	Aporectodea	1	1.3125	0.250827	3.5	6.25	3.0909	5.33	0.556	6.4	6.15	1.953	0.688	1.074	0.29	0.03	0.0271672
Ag	Aporectodea	3	1.21168	0.275727	2	3.5	1.942	5.11636	0.5	6.6	6.1	0.445	0.8	2.03	0.2858	0.41331	0.07
Ag	Aporectodea	5	1.16782	0.202061	0.5	2.25	2.87012	4.38545	0.452	7.05	5.95	1.325	0.63	2.06	0.319	0.37234	0.0094624
Ag	Aporectodea	2	1.26661	0.287969	4.25	7	5.00484	6.80984	0.3328	6.38	6.25	1.51	0.81	2	0.28695	0.07	0.0427778
Ag	Aporectodea	2	1.31888	0.253565	14	15.5	9.83539	5.30943	0.1768	5.86	4.75	0.99	0.88	1.1	0.3212	0.132	0.3014
Ag	Aporectodea	2	1.26647	0.153087	8	12.5	4.54541	4.80377	0.1236	5.86	7.5	1.375	1.1	1.78	0.2833	0.011	0.066
Ag	Aporectodea	13	1.169	0.273249	10	10	13.2	3.654	0.616	6.3	6.49	2.175	0.78	1.36	0.2952	1.1698	0.0277323
Ag	Aporectodea	8	1.07956	0.22449	5.7	9.6	8.28	4.2804	0.92	5.9	6.115	2.115	0.69	0.96	0.276575	1.1995	0.0322187
Ag	Aporectodea	10	1.14802	0.276352	6.25	4.75	9.6	4.176	0.724	6.45	6.445	2	0.39	0.92	0.3011	1.11	0.03
Ag	Aporectodea	1	1.23233	0.155833	10	17.5	27.8	1.50695	2	4.95	5.9	1.975	0.65	1.3	0.2555	0.11	0.02
Ag	Aporectodea	1	1.09376	0.120919	8.5	9.5	36.9	2.40148	1.68	5.22	5.345	2.3	0.85	1.52	0.3242	0.008	0.0238
Ag	Aporectodea	2	1.01399	0.134518	9	16	32.5	2.03128	1.52	5.03	6.365	2.25	0.66	1.98	0.3316	0.11	0.02
Ag	Aporectodea	1	1.27278	0.236707	4.5	4.5	29.1	2.23041	0.732	5.5	5.6	1.9	0.65	1.74	0.2619	0.05	0.0262
Ag	Aporectodea	25	1.20353	0.30235	3.25	5.2	31.4	2.42764	1.012	5.6	5.6	2	0.69	1.52	0.3759	0.0226	0.0492
Ag	Aporectodea	18	1.36794	0.255769	5.5	6	30.76	2.48975	0.9	5.6	5.705	2.105	0.54	1.8	0.3251	0.0173	0.0324
Ag	Aporectodea	5	1.29922	0.255631	2.75	3.25	35.8	2.35327	0.776	5.8	6.15	2	0.98	1.7	0.3424	0.0303	0.0324
Ag	Aporectodea	2	1.33789	0.231873	1.75	2.75	28.7	2.49188	0.844	5.6	6.15	1.845	0.69	1.3	0.253	0.0337	0.0315
Ag	Aporectodea	8	1.42135	0.253609	1.75	2.5	22.8	2.41164	0.948	5.4	6.15	1.815	0.71	1.23	0.2509	0.0225	0.0315
Ag	Aporectodea	12	1.31487	0.223556	2.5	4	7.4125	5.12	0.708	6.16	5.826	2.033	0.688	1.332	0.15593	0.0605681	0.03
Ag	Aporectodea	1	1.20783	0.273163	6.75	9.5	11.1264	4.04	0.572	5.92	6.381	1.944	0.684	1.09	0.18945	0.0214791	0.0349528
Ag	Aporectodea	4	1.32197	0.24546	8	8.5	15.24	3.7062	0.7	5.8	6.6	2.18	0.26	1.49	0.2952	1.1383	0.0388252
Ag	Aporectodea	8	1.25397	0.240258	4.5	4.5	20.19	4.4892	0.712	6.2	6	2	0.65	1	0.3039	1.0911	0.0605681
Ag	Aporectodea	8	1.3102	0.268949	3	3.5	24	4.1934	0.56	6.05	6.2	1.6	0.36	0.99	0.3252	1.11	0.03
Ag	Aporectodea	17	1.2278	0.21142	5.5	9.5	0.1	4.87273	0.692	6.65	5.05	0.8	1.01	1.9	0.3812	0.397344	0.0756187
Cg	Aporectodea	2	1.26864	0.375272	0	0.75	7.24983	4.76444	0.2976	6.28	5	2	0.86	0.98	0.41316	0.183059	0.1
Cg	Aporectodea	2	1.03978	0.428273	0	0	3.37212	6.84889	0.2716	6.05	4.55	0.7	1.02	1.4	0.47409	0.12	0.277444
Cg	Aporectodea	2	1.04812	0.372216	7.5	9	7.1904	6.7	0.2316	5.75	5.3	0.85	0.75	1.7	0.2941	0.17	0.1672
Cg	Aporectodea	7	1.00833	0.380055	0.5	3.5	3.36212	5.68868	0.1468	5.53	6.05	0.525	0.66	0.98	0.3203	0.164	0.1034
Cg	Aporectodea	7	1.30303	0.23811	0.5	0.5	5.70918	5.23	0.916	7.08	4.698	2.018	0.528	1.338	0.26956	0.12	0.058022
Cg	Aporectodea	2	1.06395	0.301385	0.0001	0.0001	4.36888	6.22	0.492	6.09	5.625	2.035	0.842	1.338	0.34139	0.207595	0.07
Cg	Aporectodea	2	1.0852	0.298575	0.5	0.5	5.36559	7.05	0.516	5.5	5.385	2.09	0.826	1.534	0.20682	0.253165	0.0423834
Cg	Aporectodea	2	1.25349	0.355954	0.0001	0.0001	16.487	3.99	0.568	8.96	5.511	1.971	0.806	1.632	0.2196	0.12	0.0880227
Cg	Aporectodea	2	1.25	0.32	0.5	0.75	14.83	1.625	1.664	7.32	4.335	0.955	1.21	1.1	0.194635	0.0670003	0.01496
Cg	Aporectodea	2	1.05	0.33	6	12.25	16.79	4.41667	1.028	6.02	4.36	0.545	0.05	0.76	0.373572	0.0427131	0.03696
Cg	Aporectodea	6	1.18386	0.351092	1.05	1.65	28.5482	5.0566	0.668	6.16	5.01	1	0.8	0.98	0.396	0.276905	0.0548628
Cg	Aporectodea	2	1.12862	0.326263	10.5	17	24.5264	4.04528	0.424	6.55	4.915	1.505	0.64	0.33	0.3662	0.28	0.0053198
Cg	Aporectodea	3	1.17531	0.448553	0	0.75	50.1087	7.44444	0.2664	5.91	4.79	1.6	0.7	1.1	0.39474	0.14718	0.052381
Cg	Aporectodea	2	1.06462	0.417351	0	1	3.16803	5.95556	0.3092	5.51	5.1	1.6	0.91	0.78	0.29167	0.13	0.0672222
Cg	Aporectodea	5	1.12625	0.304467	3	3	11.9235	4.55094	0.1368	5.6	5.1	0.95	0.55	1.13	0.2359	0.162	0.0176
Cg	Aporectodea	10	1.06752	0.423484	0	2	4.82383	5.68868	0.156	5.55	4.525	1.025	0.92	1.6	0.2853	0.114	0.0022
Cg	Aporectodea	5	1.18544	0.389293	6.5	3.5	4.4062	5.43585	0.1564	4.92	4.85	0.85	0.8	1.56	0.2867	0.119	0.0616
Cg	Aporectodea	6	1.20294	0.3306	3.5	4	5.7983	4.04528	0.104	5.22	5.5	1.15	1.05	0.9	0.188	0.169	0.0616
Cg	Aporectodea	1	1.12429	0.237427	5	7.5	14.1277	3.14062	0.462	6.3	5.4	1.33	0.7	1.1	0.245	0.144	0.0048
Cg	Aporectodea	1	1.27938	0.223271	6.5	6.5	3.64054	4.1875	0.4232	6.21	5.35	1.025	0.95	1.15	0.235	0.144	0.00651429
Cg	Aporectodea	14	1.17499	0.240569	2.5	4	4.33659	3.28679	0.2904	7.29	5.5	1	0.9	1	0.2088	0.141	0.0572
Ng	Aporectodea	2	1.47093	0.212555	23	20	18.9	4.611	4.2	9.1	5.75	2.225	1.95	1.25	0.3985	1.14	0.19
Ng	Aporectodea	3	1.20951	0.251699	8.2	13.8	12.5	2.5404	2	7.5	6.6	1.815	1.02	1.25	0.3018	1.3371	0.382375
Ng	Aporectodea	1	1.5098	0.14528	15	17	18.6	2.871	6.8	9.2	5.5	2.075	2.05	1.35	0.3765	0.554	0.138
Ng	Aporectodea	2	1.29034	0.138736	7.5	11.5	12.9	1.74	0.98	7.25	6.6	1.6	1.23	1.25	0.244	0.361	0.0899
Ng	Aporectodea	2	1.35492	0.203136	10.5	14	11.8	2.53351	3.172	9.18	6.45	1.9	2.1	1.1	0.3042	0.0455	0.0498
Ng	Aporectodea	6	1.35157	0.1325	30	30	0.1	2.43636	2.724	8.96	6.675	1.115	2.02	2	0.199	0.35	0.0632653
Ng	Aporectodea	1	1.09699	0.239388	5.5	10	1.73575	6.82182	1.044	6.4	6.25	1	1.02	2.6	0.4119	0.466	0.08
Ng	Aporectodea	7	1.22031	0.46	0	2.5	5.20893	5.98	0.46	7.41	6.15	2.1	2.15	1.95	0.33508	0.09	0.196778
Ng	Aporectodea	3	1.32572	0.263419	1.5	6	4.4062	4.04528	0.2384	7.56	8.175	1.39	2.1	1.15	0.1733	0.164	0.022
Ng	Aporectodea	1	1.4514	0.256061	13.2	12.5	17.4	4.35	3.06	8.5	5.625	2.35	1.75	1.35	0.3815	1.0845	0.167619
Ng	Aporectodea	2	1.06673	0.262639	3.4	8.5	31.14	6.612	1.68	7.1	5.6	1.93	0.89	1	0.3172	0.8769	0.119654
Ng	Aporectodea	1	1.54091	0.144094	18	19	17.8	3.654	4.4	8.95	5.525	1.875	1.85	1.65	0.2775	0.32	0.1
Ng	Aporectodea	1	1.09067	0.0669923	18.9	26	33.2	4.5762	1.388	6.27	5.67	1.8	0.69	1	0.3496	0.369	0.0384
Ng	Aporectodea	1	1.58497	0.121162	10	7	16.1	3.3756	2.7368	8.51333	5.65	2.05	1.63	1.47	0.18	0.048	0.1937
Ng	Aporectodea	2	1.1373	0.131903	17	25	14.7	2.54318	1.58	6.23667	5.95	2	1.1	1.13	0.3823	0.145	0.1395
Ng	Aporectodea	1	1.19327	0.130346	16	21	14.3	2.29227	1.64	7.28	6.55	1.9	1	1.25	0.328	0.16	0.09
Ng	Aporectodea	1	1.17064	0.228933	8.25	12.75	12.1	2.5242	0.94	7.3	6.15	1.6	1.3	1.24	0.2606	0.0001	0.0347
Ng	Aporectodea	4	1.02444	0.256309	8	8.75	2.04513	5.80979	1.752	8.16	9.9	1.715	0.08	1.7	0.177121	0.26	0.09
Ng	Aporectodea	2	1.03158	0.236944	4.25	6.5	8.9545	6.37203	0.996	7.02	9.505	1.56	0.05	1.56	0.294369	0.26	0.09416
Ng	Aporectodea	4	1.07446	0.139702	4.75	11.5	8.542	6.74685	0.94	6.97	10.2	1.7	0.08	1.74	0.267977	0.26	0.08976
Ng	Aporectodea	1	0.9669	0.30472	8	10.5	9.88263	4.87273	1.224	6.94	9	1.625	0.84	1	0.2743	0.355252	0.198151
Ng	Aporectodea	6	1.12178	0.254148	6	13	0.49825	3.16727	1.572	8.29	10.1	2.3	0.89	1.35	0.3263	0.35	0.121157
Ng	Aporectodea	3	1.21754	0.411711	0.5	4	6.22938	7.14667	0.572	7.02	5.5	2	2	1.5	0.34396	0.15	0.133222
Ng	Aporectodea	4	1.4278	0.328328	1	3	14.1889	4.35	0.528	6.89	6.35	1.9	2.01	2.1	0.51163	0.178942	0.1
Ng	Aporectodea	1	1.14144	0.331989	5.5	9.5	3.50133	5.56226	0.2648	7.68	8	1.55	1.44	1.1	0.2662	0.194	0.033
Ng	Aporectodea	11	1.15111	0.308861	3.5	8.5	4.75422	4.1717	0.2328	8.14	7.8	1.39	1.9	1.7	0.1712	0.187	0.044
Ng	Aporectodea	5	1.22631	0.137471	24	0	7.81684	4.60625	0.3884	7.1	7.5	1.525	0.9	1.6	0.3476	0.08	0.0399429
Ng	Aporectodea	3	1.11848	0.117393	23	0	9.34815	6.28125	0.3112	6.07	7.1	1.45	1.8	1.23	0.2693	0.138	0.0193714
Ng	Aporectodea	5	1.21787	0.124292	17	23.5	7.63123	4.60625	0.2928	6.55	8.45	1.025	1.43	1.98	0.2585	0.15	0.0330857
Ng	Aporectodea	5	1.34032	0.192983	10.5	20	14.7	2.33913	0.904	7.3	6.48	1.9	0.88	1.25	0.2423	0.03	0.0194
Ng	Aporectodea	11	1.1923	0.234564	4.25	6	7.07488	5.91	0.74	8.88	6.267	1.68	1.128	1.124	0.31558	0.177723	0.13816
Cg	Eukerria	1	1.04961	0.22521	0.0001	0.0001	12.8247	6.08	0.68	6.1	5.09	1.859	0.48	1.502	0.34229	0.102553	0.0913964
Cg	Eukerria	3	1.30303	0.23811	0.5	0.5	5.70918	5.23	0.916	7.08	4.698	2.018	0.528	1.338	0.26956	0.12	0.058022
Cg	Eukerria	3	1.06395	0.301385	0.0001	0.0001	4.36888	6.22	0.492	6.09	5.625	2.035	0.842	1.338	0.34139	0.207595	0.07
Cg	Eukerria	2	1.0852	0.298575	0.5	0.5	5.36559	7.05	0.516	5.5	5.385	2.09	0.826	1.534	0.20682	0.253165	0.0423834
Cg	Eukerria	5	1.25349	0.355954	0.0001	0.0001	16.487	3.99	0.568	8.96	5.511	1.971	0.806	1.632	0.2196	0.12	0.0880227
Cg	Eukerria	2	0.99	0.35	3	6	13.08	4.1375	0.864	6.17	6.445	1.015	0.69	0.73	0.300199	0.0698416	0.08096
Cg	Eukerria	2	1	0.43	2	6.5	51.22	3.85833	0.972	6.3	4.27	1.055	0.03	1.44	0.39237	0.0683252	0.00616
Cg	Eukerria	2	1.25	0.32	0.5	0.75	14.83	1.625	1.664	7.32	4.335	0.955	1.21	1.1	0.194635	0.0670003	0.01496
Cg	Eukerria	3	0.9	0.45	2	4	40.01	3.3	0.788	6.28	2.825	1.015	0.03	1.8	0.327559	0.0463447	0.03256
Cg	Eukerria	1	1.01	0.26	3.75	4.25	10.44	3.67222	0.72	5.97	4	0.855	0.09	0.87	0.299621	0.056464	0.01056
Cg	Eukerria	1	1.21911	0.321843	9	10.5	10.192	4.80377	0.676	6.54	4.555	2.05	0.64	0.65	0.2995	0.28	0.0764837
Cg	Eukerria	15	1.18386	0.351092	1.05	1.65	28.5482	5.0566	0.668	6.16	5.01	1	0.8	0.98	0.396	0.276905	0.0548628
Cg	Eukerria	4	1.06838	0.21342	7	10	20.917	3.79245	1.22	7.17	4.575	1.45	0.83	1.4	0.2702	0.28	0.0857601
Cg	Eukerria	2	1.12862	0.326263	10.5	17	24.5264	4.04528	0.424	6.55	4.915	1.505	0.64	0.33	0.3662	0.28	0.0053198
Cg	Eukerria	1	1.16196	0.349672	1.75	5.5	8.9545	5.81509	0.448	6.13	5	0.85	1.23	1.08	0.3798	0.278194	0.0464503
Cg	Eukerria	5	1.30153	0.385902	0	2.5	6.22938	6.84889	0.3304	6.82	6.075	1.9	0.67	0.98	0.26242	0.15	0.0647778
Cg	Eukerria	19	1.37828	0.366465	0	2.75	4.80075	3.87111	0.3684	6.67	5.125	2.05	0.79	1.4	0.24282	0.0997721	0.0272381
Cg	Eukerria	8	1.17531	0.448553	0	0.75	50.1087	7.44444	0.2664	5.91	4.79	1.6	0.7	1.1	0.39474	0.14718	0.052381
Cg	Eukerria	4	1.28777	0.421995	0	0.5	30.5161	4.46667	0.3012	5.94	5.075	1	0.78	1.3	0.26713	0.154531	0.1
Cg	Eukerria	2	1.06462	0.417351	0	1	3.16803	5.95556	0.3092	5.51	5.1	1.6	0.91	0.78	0.29167	0.13	0.0672222
Cg	Eukerria	7	1.35658	0.141029	0.5	1.5	3.16803	6.55111	0.3204	5.84	4.45	1.175	0.86	1.1	0.37531	0.15	0.0481905
Cg	Eukerria	3	0.872267	0.448164	0.5	1.25	4.18848	7.74222	0.3664	5.8	4.35	0.65	1.3	0.89	0.35078	0.19	0.0941111
Cg	Eukerria	1	1.19196	0.465957	1.25	3.25	1.94349	8.63556	0.3092	5.88	4.075	1.05	0.75	0.97	0.4723	0.158174	0.0647778
Cg	Eukerria	2	1.19018	0.267669	5	12	3.64054	4.04528	0.2128	5.72	4.575	1.05	1	1.5	0.2975	0.157	0.044
Cg	Eukerria	5	1.00833	0.380055	0.5	3.5	3.36212	5.68868	0.1468	5.53	6.05	0.525	0.66	0.98	0.3203	0.164	0.1034
Cg	Eukerria	24	1.12625	0.304467	3	3	11.9235	4.55094	0.1368	5.6	5.1	0.95	0.55	1.13	0.2359	0.162	0.0176
Cg	Eukerria	5	1.06752	0.423484	0	2	4.82383	5.68868	0.156	5.55	4.525	1.025	0.92	1.6	0.2853	0.114	0.0022
Cg	Eukerria	5	1.18544	0.389293	6.5	3.5	4.4062	5.43585	0.1564	4.92	4.85	0.85	0.8	1.56	0.2867	0.119	0.0616
Cg	Eukerria	9	1.09607	0.295032	1.5	3.5	7.81684	3.53962	0.2412	7.77	5.45	1.05	1.3	1	0.2523	0.139	0.0616
Cg	Eukerria	4	1.20294	0.3306	3.5	4	5.7983	4.04528	0.104	5.22	5.5	1.15	1.05	0.9	0.188	0.169	0.0616
Cg	Eukerria	1	1.11882	0.351223	0	0.5	5.24146	4.55094	0.2488	7.06	4.475	0.75	0.9	1.7	0.2948	0.149	0.1386
Cg	Eukerria	5	0.99268	0.37399	0	0	5.51987	5.56226	0.1352	5.24	5	0.83	1.2	0.96	0.4254	0.182	0.0506
Cg	Eukerria	3	1.13178	0.349352	0	6	3.36212	5.94151	0.1672	5.5	4.9	1	1.07	1.3	0.327	0.18	0.0572
Cg	Eukerria	2	1.0665	0.25438	2	1.5	3.38532	5.23438	0.5048	5.48	5.25	1.4	1.25	1.65	0.293	0.18	0.00737143
Cg	Eukerria	2	1.05772	0.292009	8	9	8.14166	4.39687	0.3872	5.71	4.675	1.1	1.1	1.25	0.3169	0.181	0.00394286
Cg	Eukerria	1	1.12429	0.237427	5	7.5	14.1277	3.14062	0.462	6.3	5.4	1.33	0.7	1.1	0.245	0.144	0.0048
Cg	Eukerria	3	0.828877	0.2307	0	0.5	5.68229	3.97812	0.412	5.9	5.6	1.45	0.77	0.68	0.2229	0.12	0.00737143
Cg	Eukerria	1	1.03659	0.260857	2.5	2	7.35281	3.76875	0.3212	6.12	4.575	0.925	1.05	0.9	0.2207	0.152	0.00651429
Ag	Microscolex	1	1.21767	0.281934	8.5	8.25	16.7	4.2978	0.52	6.2	6.48	2.25	0.69	1.2	0.2952	1.11	0.03
Ag	Microscolex	2	1.3102	0.268949	3	3.5	24	4.1934	0.56	6.05	6.2	1.6	0.36	0.99	0.3252	1.11	0.03
Ag	Microscolex	2	1.07956	0.22449	5.7	9.6	8.28	4.2804	0.92	5.9	6.115	2.115	0.69	0.96	0.276575	1.1995	0.0322187
Ag	Microscolex	3	1.36794	0.255769	5.5	6	30.76	2.48975	0.9	5.6	5.705	2.105	0.54	1.8	0.3251	0.0173	0.0324
Ag	Microscolex	2	1.3125	0.250827	3.5	6.25	3.0909	5.33	0.556	6.4	6.15	1.953	0.688	1.074	0.29	0.03	0.0271672
Ag	Microscolex	2	1.16098	0.314564	6.5	8	7.65801	6.59016	0.3692	6.17	6	1.505	0.56	2.66	0.26146	0.1	0.0230476
Ag	Microscolex	1	1.26661	0.287969	4.25	7	5.00484	6.80984	0.3328	6.38	6.25	1.51	0.81	2	0.28695	0.07	0.0427778
Ag	Microscolex	2	1.15105	0.272769	8.5	16	4.05817	5.18302	0.2036	5.66	5.01	1.075	1.01	2.13	0.2835	0.148	0.0396
Ag	Microscolex	1	1.31888	0.253565	14	15.5	9.83539	5.30943	0.1768	5.86	4.75	0.99	0.88	1.1	0.3212	0.132	0.3014
Ag	Microscolex	2	1.24687	0.24015	12.5	16	7.60803	5.18302	0.2424	5.7	7	1.6	0.77	2.1	0.2935	0.143	0.0484
Ag	Microscolex	1	1.26647	0.153087	8	12.5	4.54541	4.80377	0.1236	5.86	7.5	1.375	1.1	1.78	0.2833	0.011	0.066
Cg	Microscolex	2	1.02708	0.449062	0.5	3.5	4.05817	6.32075	0.1508	5.89	4.725	1.08	0.95	1.65	0.3363	0.166	0.0748
Cg	Microscolex	1	1.30153	0.385902	0	2.5	6.22938	6.84889	0.3304	6.82	6.075	1.9	0.67	0.98	0.26242	0.15	0.0647778
Cg	Microscolex	2	1.06752	0.423484	0	2	4.82383	5.68868	0.156	5.55	4.525	1.025	0.92	1.6	0.2853	0.114	0.0022
Cg	Microscolex	3	1.09607	0.295032	1.5	3.5	7.81684	3.53962	0.2412	7.77	5.45	1.05	1.3	1	0.2523	0.139	0.0616
Ng	Microscolex	1	1.20155	0.204598	9.5	12.5	0.91075	5.84727	1.04	6.19	10.6	1.85	0.98	1.3	0.3313	0.395803	0.0422113
Ng	Microscolex	2	1.15507	0.489324	4	8.5	3.37212	8.93333	0.552	7.45	5.45	1.9	1.74	2.6	0.34945	0.15	0.0354444
Ng	Microscolex	4	1.33033	0.281886	1	1	5.72869	7.33208	0.234	6.67	5.15	2.05	1.9	1.93	0.4183	0.234	0.0506
Ng	Microscolex	3	1.43621	0.208444	1.6	20	18.9	3.1146	2.08	8.98	5.75	2.375	1.95	1	0.3985	1.0321	0.167619
Ng	Microscolex	2	1.47093	0.212555	23	20	18.9	4.611	4.2	9.1	5.75	2.225	1.95	1.25	0.3985	1.14	0.19
Ng	Microscolex	4	1.06673	0.262639	3.4	8.5	31.14	6.612	1.68	7.1	5.6	1.93	0.89	1	0.3172	0.8769	0.119654
Ng	Microscolex	1	1.25173	0.173751	8.4	11	32.6	5.1852	1.024	7.2	5.68	1.87	0.69	1.1	0.313633	1.1189	0.222991
Ng	Microscolex	5	1.12869	0.247524	7.1	18.2	32.6	4.4544	1.4	6.8	5.675	1.975	0.87	1.24	0.269	1.3924	0.108776
Ng	Microscolex	2	1.44693	0.203582	11	20.5	38.5	5.568	1.72	6.7	5.99	1.98	0.74	1.2	0.4313	1.14	0.19
Ng	Microscolex	4	1.30902	0.223372	9.5	11	33.9	6.09	1.404	6.8	5.51	1.55	0.9	1.13	0.2406	1.14	0.19
Ng	Microscolex	2	1.13625	0.158187	14.2	17.5	14.3	2.7492	2.252	7.3	5.89	1.625	0.99	1.21	0.35	1.1428	0.177723
Ng	Microscolex	1	1.33217	0.219392	12.5	9.5	11.69	2.9406	3.24	7.54	5.845	1.56	0.98	1.12	0.35	1.14	0.19
Ng	Microscolex	2	1.11152	0.13017	16.5	16	32.1	5.568	0.7606	6.63	5.875	1.925	0.87	1.2	0.304	0.228	0.0432
Ng	Microscolex	2	1.09067	0.0669923	18.9	26	33.2	4.5762	1.388	6.27	5.67	1.8	0.69	1	0.3496	0.369	0.0384
Ng	Microscolex	4	1.1884	0.139236	13.5	26	34.5	4.785	1.108	6.4	5.8	1.845	0.54	1	0.3418	0.203	0.0817
Ng	Microscolex	2	1.27081	0.0677431	30	30	35.89	4.698	1.8	6.8	5.625	1.675	0.9	1.45	0.2837	0.32	0.1
Ng	Microscolex	2	1.03918	0.0949307	17	20.75	33.9	4.6806	1.25	7.1	5.78	1.56	0.68	1.62	0.2115	0.32	0.1
Ng	Microscolex	1	1.15907	0.23502	10	20	11.78	2.8536	1.1	6.9	6.05	1.5	1	1.12	0.3034	0.388	0.1049
Ng	Microscolex	4	1.21195	0.116453	10	9	13	2.09301	1.24788	6.81	6.05	1.48	0.95	1.23	0.4657	0.176	0.0179
Ng	Microscolex	1	1.1373	0.131903	17	25	14.7	2.54318	1.58	6.23667	5.95	2	1.1	1.13	0.3823	0.145	0.1395
Ng	Microscolex	1	1.31283	0.112013	22	25	8.3	2.54318	1.92	6.08	6.75	1.79	1.25	1.1	0.2817	0.118	0.0238
Ng	Microscolex	3	0.894425	0.0951471	10	12	13.56	2.62741	0.88	5.43	6.35	1.895	1.36	1.23	0.2667	0.16	0.09
Ng	Microscolex	1	1.45574	0.185227	14.75	14	12.6	2.41164	3.748	8.53	5.65	2.05	2	1.21	0.1431	0.03	0.0345
Ng	Microscolex	1	1.03254	0.251529	16.5	13	13.9	2.54203	1.164	6.82	6.55	1.8	0.91	1.3	0.3308	0.0048	0.0668
Ng	Microscolex	1	1.4587	0.166727	8	16.5	13.7	2.62035	1.7	6.9	6.5	1.9	0.8	1.41	0.191	0.03	0.0495
Ng	Microscolex	1	1.32829	0.205278	10.5	17	13.9	2.39819	1.188	7.2	6.27	1.58	1.1	1.2	0.3	0.0802	0.1264
Ng	Microscolex	1	1.19533	0.230337	6	8.5	3.49605	4.88	0.708	6.94	6.06	1.777	0.88	1.196	0.28326	0.119654	0.09
Ng	Microscolex	1	1.1448	0.253031	4.5	5.75	6.46715	5.41	0.824	6.98	5.925	1.804	0.742	1.16	0.40152	0.222991	0.08536
Ng	Microscolex	1	1.2677	0.224454	7.75	10	5.38675	3.94	0.668	7.09	5.963	1.835	0.74	1.304	0.27032	0.19	0.04236
Ng	Microscolex	1	1.27855	0.221262	6.75	8	9.50577	5.12	0.74	7.81	6.594	1.62	1.166	1.16	0.20682	0.382375	0.09416
Ng	Microscolex	2	1.03158	0.236944	4.25	6.5	8.9545	6.37203	0.996	7.02	9.505	1.56	0.05	1.56	0.294369	0.26	0.09416
Ng	Microscolex	4	0.879575	0.211669	6	7.75	11.2233	5.9972	0.672	6.54	11.05	1.89	0.04	2.26	0.230571	0.26	0.10736
Ng	Microscolex	1	1.20866	0.220263	0	4	2.87012	3.16727	0.652	6.45	7	2	0.76	1.89	0.3533	0.35	0.072445
Ng	Microscolex	3	0.9669	0.30472	8	10.5	9.88263	4.87273	1.224	6.94	9	1.625	0.84	1	0.2743	0.355252	0.198151
Ng	Microscolex	6	1.23662	0.342552	16.25	26.75	14.9644	3.07541	0.512	8.1	7.175	1.5	1	1.78	0.28718	0.15	0.0892222
Ng	Microscolex	4	1.24267	0.343001	0	3.5	2.14758	6.25333	0.3956	7.69	8.8	1.545	1.23	1.7	0.3831	0.15	0.103889
Ng	Microscolex	4	1.21248	0.383869	4.5	8.5	0.1	5.65778	0.404	8.07	8.05	1.28	0.96	1.95	0.26545	0.23	0.133222
Ng	Microscolex	7	1.25372	0.326759	4.5	8	0.1	5.65778	0.552	8.46	9.35	1.3	1.35	1.4	0.27872	0.254851	0.1
Ng	Microscolex	3	1.22912	0.348815	2.5	8	0.1	6.84889	0.404	7.29	8.545	1.4	1.4	1.66	0.37243	0.13	0.145444
Ng	Microscolex	3	1.19182	0.289538	2.5	5	3.22291	2.78113	0.1068	7.24	6.5	1.445	1	1.78	0.1787	0.15	0.0154
Ng	Microscolex	4	1.30001	0.305661	4	6.5	1.55239	3.53962	0.1456	7.03	6.1	1.6	1.1	2	0.3013	0.154	0.0176
Ng	Microscolex	2	1.24424	0.297637	5.5	9.5	4.54541	5.68868	0.3152	8.29	8.5	1.33	0.98	2.03	0.1443	0.17	0.099
Ng	Microscolex	3	1.31954	0.216358	6.5	11	5.58948	5.94151	0.2688	6.7	9	1.45	1.75	2	0.2594	0.154	0.0132
Ng	Microscolex	3	1.20491	0.119566	7.5	17	5.31106	6.49062	0.3164	6.6	7.8	0.9	0.77	2	0.217	0.14	0.0288
Ng	Microscolex	2	1.11848	0.117393	23	0	9.34815	6.28125	0.3112	6.07	7.1	1.45	1.8	1.23	0.2693	0.138	0.0193714
Ng	Microscolex	4	1.34155	0.1389	15	20.5	9.30175	6.07188	0.288	6.38	8.65	1	1.65	1.98	0.424	0.114	0.0348
Ag	Octolasion	2	1.25397	0.240258	4.5	4.5	20.19	4.4892	0.712	6.2	6	2	0.65	1	0.3039	1.0911	0.0605681
Ag	Octolasion	3	1.30526	0.214415	2.75	6	1.4703	4.77	0.58	6.19	6.495	2.055	0.66	1.11	0.2964	0.0332787	0.03
Ag	Octolasion	2	1.27278	0.236707	4.5	4.5	29.1	2.23041	0.732	5.5	5.6	1.9	0.65	1.74	0.2619	0.05	0.0262
Ag	Octolasion	2	1.42135	0.253609	1.75	2.5	22.8	2.41164	0.948	5.4	6.15	1.815	0.71	1.23	0.2509	0.0225	0.0315
Ag	Octolasion	4	1.26048	0.212251	6.5	11	1.52	5.11636	0.872	6.03	5.945	0.475	0.79	1.2	0.3282	0.280358	0.04
Ag	Octolasion	21	1.11645	0.296301	1	2	4.52013	5.11636	0.692	6.06	3.9	1.025	0.9	1.3	0.3327	0.32194	0.04
Ag	Octolasion	2	1.26661	0.287969	4.25	7	5.00484	6.80984	0.3328	6.38	6.25	1.51	0.81	2	0.28695	0.07	0.0427778
Ag	Octolasion	2	1.26647	0.153087	8	12.5	4.54541	4.80377	0.1236	5.86	7.5	1.375	1.1	1.78	0.2833	0.011	0.066
Cg	Octolasion	4	1.19018	0.267669	5	12	3.64054	4.04528	0.2128	5.72	4.575	1.05	1	1.5	0.2975	0.157	0.044
Cg	Octolasion	2	1.30153	0.385902	0	2.5	6.22938	6.84889	0.3304	6.82	6.075	1.9	0.67	0.98	0.26242	0.15	0.0647778
Cg	Octolasion	3	1.03978	0.428273	0	0	3.37212	6.84889	0.2716	6.05	4.55	0.7	1.02	1.4	0.47409	0.12	0.277444
Ng	Octolasion	2	1.07446	0.139702	4.75	11.5	8.542	6.74685	0.94	6.97	10.2	1.7	0.08	1.74	0.267977	0.26	0.08976
Ng	Octolasion	3	0.9669	0.30472	8	10.5	9.88263	4.87273	1.224	6.94	9	1.625	0.84	1	0.2743	0.355252	0.198151
Ng	Octolasion	4	1.21787	0.124292	17	23.5	7.63123	4.60625	0.2928	6.55	8.45	1.025	1.43	1.98	0.2585	0.15	0.0330857
Ng	Octolasion	7	1.02444	0.256309	8	8.75	2.04513	5.80979	1.752	8.16	9.9	1.715	0.08	1.7	0.177121	0.26	0.09
Ng	Octolasion	4	0.58058	0.469417	3	4.75	29.3733	6.09091	1.324	6.45	11.7	1.5	0.21	2.24	0.309613	0.26	0.13816
Ng	Octolasion	8	0.879575	0.211669	6	7.75	11.2233	5.9972	0.672	6.54	11.05	1.89	0.04	2.26	0.230571	0.26	0.10736
Ng	Octolasion	5	1.12178	0.254148	6	13	0.49825	3.16727	1.572	8.29	10.1	2.3	0.89	1.35	0.3263	0.35	0.121157
Ng	Octolasion	2	1.19452	0.174365	8.5	7.5	1.5295	4.38545	0.944	7.38	9.55	2.55	1.57	1.2	0.241	0.35	0.126881
Ng	Octolasion	7	1.22631	0.137471	24	0	7.81684	4.60625	0.3884	7.1	7.5	1.525	0.9	1.6	0.3476	0.08	0.0399429
Ng	Octolasion	4	1.20491	0.119566	7.5	17	5.31106	6.49062	0.3164	6.6	7.8	0.9	0.77	2	0.217	0.14	0.0288
Ng	Octolasion	8	1.34155	0.1389	15	20.5	9.30175	6.07188	0.288	6.38	8.65	1	1.65	1.98	0.424	0.114	0.0348
Ag	Agricultural fields with at least 50 years of continuous intensive agriculture
Cg	Cattle grazing fields, turned into agriculture 2 years prior of the start of the study
Ng	Naturalized Grasslands. Fields with at least 50 years with no significant anthropic impact
MR	Mechanical Resistance to penetration. First 0-5 cm, and then 5-10 cm
OM	Organic Matter in the soil sample
EC	Electrical Conductivity
Analysis at the Genus level includes non-clitelated individuals
